# Supplementary material for: Population Structure, Diversity and Reproductive Mode of the Grape Phylloxera (Daktulosphaira vitifoliae) across Its Native Range
Source: PLoS One. 2017 Jan 26;12(1):e0170678. doi: 10.1371/journal.pone.0170678 (PMC5268464; doi:10.1371/journal.pone.0170678)
Supplement: S2 Table — ND reflects no data. (XLSX) [file pone.0170678.s002.xlsx]

## Sheet: Sheet1
MLG	Sample Id	Sample Source	North	West	State	Host Plant	PhyII_6	PhyII_10	PhyII_13	PhyII_16	PhyII_23	PhyII_31	PhyII_34	PhyII_36	PhyIII_15	PhyIII_19	PhyIII_30	PhyIII_36	PhyIII_42	PhyIII_46	PhyIII_49	PhyIII_53	PhyIII_55	PhyIII_61	PhyIII_63	PhyIII_65	PhyIII_69	PhyIII_87	PhyIV_4	Dvit1	Dvit6	DV3
MLG-001	AR0681071	Leaf	N 35 09 11.0	W 90 07 38.3	AR	V. riparia	93-110	136-136	138-140	107-107	106-108	102-111	117-117	ND	134-134	87-90	131-131	193-199	154-166	104-107	123-123	238-238	126-129	109-109	127-138	100-100	121-121	134-134	233-233	130-130	202-202	232-252
MLG-002	AR0681072	Leaf	N 35 09 11.0	W 90 07 38.3	AR	V. riparia	110-110	136-136	138-140	105-114	106-108	102-111	117-117	122-126	134-134	87-90	131-131	193-199	154-166	104-104	123-132	238-238	129-129	110-110	127-138	100-100	121-121	134-134	233-233	130-130	202-202	230-252
MLG-003	AR0681073	Leaf	N 35 09 11.0	W 90 07 38.3	AR	V. riparia	110-110	136-136	138-140	112-112	106-108	102-111	117-117	122-126	134-134	87-90	131-131	193-199	154-166	104-104	123-132	238-238	129-129	110-110	127-138	100-100	121-121	134-134	233-233	130-130	202-202	253-253
MLG-004	AR0681081	Leaf	N 35 09 11.0	W 90 07 38.3	AR	V. riparia	93-110	136-136	136-136	112-112	106-106	94-104	117-117	118-122	134-134	87-90	131-131	193-193	158-166	104-104	123-123	238-238	129-129	109-109	135-138	100-100	121-121	134-134	ND	ND	202-202	ND
MLG-005	AR0691092	Leaf	N 35 45 09.3	W 89 55 25.1	AR	V. cinerea	116-116	132-132	ND	112-112	100-100	96-96	105-105	118-124	134-137	87-93	119-119	193-199	132-132	104-107	117-117	238-238	123-123	107-107	129-129	79-79	121-130	131-137	ND	118-118	196-224	234-234
MLG-006	AR0691093	Leaf	N 35 45 09.3	W 89 55 25.1	AR	V. cinerea	93-93	132-132	134-138	112-112	100-100	96-96	105-105	118-118	134-137	87-93	119-119	193-193	132-132	107-110	117-117	238-238	123-123	107-107	135-135	ND	121-130	131-137	ND	118-118	196-224	234-234
MLG-007	AR0691095	Leaf	N 35 45 09.3	W 89 55 25.1	AR	V. cinerea	110-110	132-132	117-136	105-112	100-100	96-96	105-105	118-122	134-134	87-93	119-119	193-199	132-132	104-107	117-117	238-238	126-135	107-107	129-135	104-104	121-127	131-134	238-238	118-118	196-196	234-234
MLG-008	AR0691101	Leaf	N 35 45 09.3	W 89 55 25.1	AR	V. cinerea	91-93	132-132	ND	112-113	100-100	96-96	105-105	122-122	134-134	87-93	119-119	193-193	ND	107-107	117-117	238-238	135-135	107-107	129-129	ND	121-133	131-131	238-238	118-118	196-196	234-234
MLG-009	AR0691102	Leaf	N 35 45 09.3	W 89 55 25.1	AR	V. cinerea	93-110	132-132	117-123	105-112	100-100	94-96	105-105	122-122	134-134	87-93	119-119	193-193	132-132	107-107	117-117	238-238	135-135	107-107	127-129	79-79	121-121	131-134	238-238	118-118	196-224	234-234
MLG-010	AR0691103	Leaf	N 35 45 09.3	W 89 55 25.1	AR	V. cinerea	ND	132-132	ND	105-112	100-100	94-96	105-105	122-122	134-134	87-90	119-119	193-199	132-134	107-107	117-117	238-238	126-135	107-107	127-129	79-79	121-127	ND	238-238	118-118	226-226	234-234
MLG-011	AR0691104	Leaf	N 35 45 09.3	W 89 55 25.1	AR	V. cinerea	110-116	132-132	117-123	105-112	100-100	96-96	105-105	122-122	134-134	87-93	119-119	199-199	134-134	107-107	117-117	238-238	135-135	107-107	129-129	79-79	ND	131-131	ND	118-118	196-226	234-234
MLG-012	AR0701113	Leaf	N 36 26 25.7	W 94 14 20.1	AR	V. cinerea	110-116	132-132	117-123	105-112	100-106	94-96	105-119	122-122	131-134	ND	119-119	193-196	136-136	107-107	117-123	238-238	123-123	107-119	127-129	79-79	121-127	134-137	233-238	118-118	196-224	234-250
MLG-013	AR0701121	Leaf	N 36 26 25.7	W 94 14 20.1	AR	V. cinerea	91-93	132-132	ND	113-113	100-100	96-96	105-105	122-122	134-134	87-93	119-131	196-196	136-136	107-107	117-117	238-238	123-123	107-107	129-129	ND	130-130	131-137	238-238	118-118	196-202	234-234
MLG-014	AR0701131	Leaf	N 36 26 25.7	W 94 14 20.1	AR	V. cinerea	93-93	132-132	135-135	112-113	100-100	96-96	105-105	122-122	134-134	87-93	119-119	196-196	136-136	107-107	117-117	238-238	123-123	107-107	129-129	ND	133-136	131-131	238-238	118-118	196-196	234-234
MLG-015	AR0701132	Leaf	N 36 26 25.7	W 94 14 20.1	AR	V. cinerea	112-116	132-132	117-125	105-112	100-100	94-96	105-105	122-122	134-134	87-93	119-119	196-196	136-136	107-107	117-117	238-238	123-123	107-107	127-129	79-79	121-133	ND	238-238	118-118	196-226	234-234
MLG-016	AR0711141	Leaf	N 35 49 12.5	W 94 12 03.2	AR	V. vulpina	91-91	134-134	123-125	107-107	104-104	94-94	105-105	ND	131-131	96-96	122-125	190-196	134-134	107-107	120-123	241-241	126-150	ND	127-127	ND	127-127	140-143	237-237	124-126	202-202	250-250
MLG-017	AR0711142	Leaf	N 35 49 12.5	W 94 12 03.2	AR	V. vulpina	ND	134-134	123-125	107-107	104-104	94-94	105-105	112-116	131-131	96-96	122-125	190-196	134-134	107-107	120-123	241-241	126-150	119-119	127-127	79-79	127-127	140-143	237-237	124-126	202-202	250-250
MLG-018	AR0711143	Leaf	N 35 49 12.5	W 94 12 03.2	AR	V. vulpina	91-91	134-134	123-125	107-107	104-104	94-94	105-105	112-116	131-131	96-96	122-125	190-196	134-134	107-107	120-123	241-241	126-150	119-119	127-127	ND	127-127	140-143	237-237	124-126	202-202	250-250
MLG-018	AR0711144	Leaf	N 35 49 12.5	W 94 12 03.2	AR	V. vulpina	91-91	134-134	123-125	107-107	104-104	94-94	105-105	112-116	131-131	96-96	122-125	190-196	134-134	107-107	120-123	241-241	126-150	119-119	127-127	ND	127-127	140-143	237-237	124-126	202-202	250-250
MLG-019	AR0711145	Leaf	N 35 49 12.5	W 94 12 03.2	AR	V. vulpina	91-91	134-134	123-125	107-107	104-104	94-94	105-105	112-116	131-131	96-96	122-125	190-196	134-134	107-107	120-123	241-241	126-150	119-119	127-127	ND	127-127	ND	237-237	124-126	202-202	250-250
MLG-020	AZ0861401	Leaf	N 31 43 39.9	W 110 52 50.4	AZ	V. arizonica	110-110	132-132	ND	105-105	100-100	96-109	113-113	118-118	137-137	87-87	119-119	187-196	146-146	107-107	114-114	238-238	120-126	107-119	127-127	79-100	121-127	134-143	237-238	120-128	ND	248-248
MLG-021	AZ0861402	Leaf	N 31 43 39.9	W 110 52 50.4	AZ	V. arizonica	ND	132-132	136-136	101-101	100-100	109-109	113-113	118-118	131-131	87-87	125-131	202-202	146-146	ND	114-114	238-238	120-120	107-110	127-127	100-100	121-127	140-140	ND	120-120	205-205	232-248
MLG-022	AZ0861403	Leaf	N 31 43 39.9	W 110 52 50.4	AZ	V. arizonica	110-110	132-132	129-129	105-114	100-101	111-111	111-111	118-118	137-137	87-87	119-125	ND	126-126	107-107	114-114	238-238	132-132	107-107	127-127	79-79	121-127	134-137	237-238	120-120	214-214	253-253
MLG-023	AZ0861404	Leaf	N 31 43 39.9	W 110 52 50.4	AZ	V. arizonica	110-112	132-132	129-129	105-114	100-101	96-111	111-111	118-118	131-137	105-105	119-125	205-205	126-126	107-107	114-114	238-238	126-132	107-107	127-127	79-79	124-130	134-137	238-238	ND	214-214	253-253
MLG-024	AZ0861405	Leaf	N 31 43 39.9	W 110 52 50.4	AZ	V. arizonica	110-112	132-132	129-134	105-112	100-101	96-111	111-111	118-118	134-137	87-87	119-125	ND	126-126	107-107	114-114	238-238	120-132	107-107	127-127	79-79	121-127	134-137	237-238	120-120	ND	253-253
MLG-025	AZ0871412	Leaf	N 35 01 32.0	W 111 44 26.7	AZ	V. arizonica	110-110	132-132	136-136	105-114	100-100	96-109	113-113	118-118	ND	87-87	119-125	202-202	146-148	107-107	114-114	238-238	120-120	107-107	127-127	79-79	121-127	134-140	ND	120-120	205-205	248-248
MLG-026	AZ0871413	Leaf	N 35 01 32.0	W 111 44 26.7	AZ	V. arizonica	110-110	132-132	117-136	105-112	100-100	96-109	113-113	118-118	131-131	87-87	119-119	ND	146-146	107-107	114-114	238-238	120-126	107-107	127-127	79-79	121-127	ND	229-233	120-120	205-205	248-248
MLG-027	AZ0871414	Leaf	N 35 01 32.0	W 111 44 26.7	AZ	V. arizonica	110-110	132-132	117-136	105-114	100-100	109-109	113-113	118-118	131-134	87-87	119-125	202-202	146-146	107-107	114-114	ND	120-120	107-107	127-127	79-79	121-127	134-140	238-238	120-120	205-205	248-248
MLG-028	AZ0881421	Leaf	N 31 43 39.9	W 110 52 50.4	AZ	V. arizonica	110-110	132-132	136-136	105-112	100-100	109-109	113-113	118-118	131-134	87-87	119-119	202-202	146-146	107-107	114-114	238-238	120-120	107-107	127-127	79-79	121-127	134-140	237-238	120-120	205-205	248-248
MLG-029	AZ0881422	Leaf	N 31 43 39.9	W 110 52 50.4	AZ	V. arizonica	ND	132-132	129-129	105-114	100-101	100-100	111-111	118-118	137-137	87-87	125-125	190-190	126-126	107-107	114-114	238-238	132-132	107-107	127-127	79-79	121-127	137-137	238-238	120-120	220-220	253-253
MLG-030	AZ0881423	Leaf	N 31 43 39.9	W 110 52 50.4	AZ	V. arizonica	112-112	132-132	117-129	105-112	100-101	96-111	111-111	118-118	134-137	105-105	125-125	205-205	126-126	107-107	114-114	238-238	132-132	107-107	127-127	79-79	124-130	134-137	237-237	124-124	214-214	253-253
MLG-031	AZ0881425	Leaf	N 31 43 39.9	W 110 52 50.4	AZ	V. arizonica	114-114	132-132	117-129	105-105	100-101	96-111	111-111	118-118	134-137	87-87	125-125	ND	126-126	107-107	114-114	238-238	132-132	107-107	127-127	79-79	121-127	134-137	233-238	120-120	214-214	253-253
MLG-032	AZ0891431	Leaf	N 34 54 45.6	W 111 43 41.0	AZ	V. arizonica	91-93	132-132	129-129	114-114	101-101	94-100	111-111	118-118	137-137	87-87	125-125	190-190	126-126	107-107	114-114	238-238	132-132	107-107	127-127	ND	121-121	ND	ND	120-120	220-220	253-253
MLG-033	AZ0891432	Leaf	N 34 54 45.6	W 111 43 41.0	AZ	V. arizonica	ND	132-132	117-129	ND	100-101	96-111	111-111	118-118	134-137	87-87	125-125	193-205	126-126	107-107	114-114	238-238	132-132	107-107	127-127	79-79	121-127	134-137	233-238	120-120	214-214	253-253
MLG-034	AZ0901441	Leaf	N 35 01 32.0	W 111 44 26.7	AZ	V. arizonica	91-93	132-132	129-129	114-114	101-101	109-111	111-111	118-118	137-137	87-87	125-125	205-205	126-126	107-107	114-114	238-238	132-132	107-110	127-127	ND	121-127	137-137	ND	120-120	214-214	253-253
MLG-035	AZ0901442	Leaf	N 35 01 32.0	W 111 44 26.7	AZ	V. arizonica	ND	132-132	117-129	105-112	100-106	96-111	111-111	118-118	134-137	87-87	125-125	205-205	126-126	107-107	114-114	238-238	126-132	107-107	127-127	79-79	121-127	ND	237-238	120-120	214-214	253-253
MLG-036	AZ0901444	Leaf	N 35 01 32.0	W 111 44 26.7	AZ	V. arizonica	ND	132-132	117-136	105-112	100-100	96-109	113-113	118-118	134-134	87-87	ND	187-202	146-146	107-107	114-114	238-238	120-120	107-107	127-127	79-79	121-127	134-140	233-238	120-128	205-205	248-248
MLG-037	AZ0901445	Leaf	N 35 01 32.0	W 111 44 26.7	AZ	V. arizonica	110-110	132-132	ND	105-112	100-106	96-98	113-113	118-118	134-137	87-87	119-125	202-202	146-146	107-107	114-114	238-238	120-126	107-119	127-127	79-79	121-127	134-143	237-238	120-120	193-205	ND
MLG-038	AZ0911451	Leaf	N 31 43 39.9	W 110 52 50.4	AZ	V. arizonica	110-112	132-132	ND	105-112	100-100	96-109	113-113	118-118	134-137	87-87	ND	ND	146-146	107-107	114-114	238-238	120-126	107-119	127-127	79-79	121-127	134-143	233-238	120-122	202-205	248-248
MLG-039	AZ0911452	Leaf	N 31 43 39.9	W 110 52 50.4	AZ	V. arizonica	91-93	132-132	136-136	101-101	100-100	109-109	113-113	118-118	ND	87-87	125-131	202-202	146-146	107-107	114-114	238-238	120-120	107-110	127-127	79-79	121-121	137-140	ND	120-120	205-205	232-248
MLG-040	AZ0911453	Leaf	N 31 43 39.9	W 110 52 50.4	AZ	V. arizonica	110-110	132-132	129-129	105-114	100-101	111-111	111-111	118-118	137-137	87-87	125-125	205-205	126-126	107-107	114-114	238-238	132-132	107-107	127-127	79-79	121-127	137-137	238-238	120-120	214-214	253-253
MLG-041	AZ0911454	Leaf	N 31 43 39.9	W 110 52 50.4	AZ	V. arizonica	110-112	132-132	129-129	105-112	100-101	96-111	111-111	118-118	137-137	87-87	125-125	187-205	126-126	107-107	114-114	238-238	132-132	107-107	127-127	79-79	121-127	134-137	238-238	120-120	214-214	253-253
MLG-042	AZ0911455	Leaf	N 31 43 39.9	W 110 52 50.4	AZ	V. arizonica	110-110	132-132	ND	105-112	100-100	96-111	111-119	118-120	134-137	87-87	125-125	193-205	126-126	104-107	114-114	238-238	126-132	107-119	127-127	79-79	121-127	134-143	238-238	118-120	214-214	253-253
MLG-043	AZ0921461	Leaf	N 35 01 32.0	W 111 44 26.7	AZ	V. arizonica	91-93	132-132	129-129	114-114	101-101	109-111	111-111	118-118	137-137	87-87	125-125	205-205	126-126	107-107	114-114	238-238	ND	107-110	127-127	ND	121-121	137-137	ND	120-120	214-214	253-253
MLG-044	AZ0921462	Leaf	N 35 01 32.0	W 111 44 26.7	AZ	V. arizonica	110-110	132-132	129-129	105-114	101-101	100-100	111-111	118-118	137-137	87-87	125-125	190-190	126-126	107-107	114-114	238-238	132-132	107-107	127-127	ND	121-130	137-137	233-238	120-120	220-220	253-253
MLG-045	AZ0921463	Leaf	N 35 01 32.0	W 111 44 26.7	AZ	V. arizonica	110-116	132-132	129-129	105-114	100-101	100-100	111-111	118-118	134-137	87-87	125-125	190-190	126-126	107-107	114-114	238-238	132-132	107-107	127-127	79-79	121-121	134-137	238-238	120-122	220-220	253-253
MLG-046	AZ0921464	Leaf	N 35 01 32.0	W 111 44 26.7	AZ	V. arizonica	110-110	132-132	129-129	105-114	100-101	100-100	111-111	118-118	134-137	87-87	125-125	190-190	126-126	107-107	114-114	238-238	132-132	107-107	127-127	79-79	121-127	134-137	238-238	120-120	220-220	253-253
MLG-047	AZ0931471	Leaf	N 34 54 45.6	W 111 43 41.0	AZ	V. arizonica	93-110	132-132	129-129	114-114	101-101	100-100	111-111	118-118	137-137	87-87	125-125	190-190	126-126	107-107	114-114	238-238	132-132	107-107	127-127	ND	130-130	ND	237-237	120-120	220-220	253-253
MLG-048	AZ0931472	Leaf	N 34 54 45.6	W 111 43 41.0	AZ	V. arizonica	110-112	132-132	129-129	ND	100-101	100-100	111-111	118-118	134-137	87-87	125-125	190-190	126-126	107-107	114-114	238-238	132-132	107-107	127-127	79-79	121-127	ND	238-238	120-120	220-220	253-253
MLG-049	AZ0931473	Leaf	N 34 54 45.6	W 111 43 41.0	AZ	V. arizonica	ND	132-132	129-129	105-114	101-101	100-100	111-111	118-118	137-137	87-87	125-125	190-190	126-126	107-107	114-114	238-238	132-132	107-107	127-127	79-79	121-130	137-137	233-238	120-120	220-220	253-253
MLG-050	AZ0931474	Leaf	N 34 54 45.6	W 111 43 41.0	AZ	V. arizonica	110-110	132-132	129-129	105-114	101-101	100-100	111-111	118-118	137-137	87-87	125-125	190-190	126-126	107-107	114-114	238-238	ND	107-107	127-127	79-79	121-130	137-137	237-238	120-120	220-220	253-253
MLG-051	AZ0931475	Leaf	N 34 54 45.6	W 111 43 41.0	AZ	V. arizonica	110-110	132-132	117-129	105-114	100-101	100-100	111-111	118-118	134-137	87-87	125-125	190-190	126-126	107-107	114-114	238-238	132-132	107-107	127-127	79-79	ND	134-137	237-238	120-120	220-220	253-253
MLG-052	AZ0931481	Leaf	N 34 54 45.6	W 111 43 41.0	AZ	V. arizonica	91-93	132-132	129-129	114-114	101-101	100-100	111-111	118-118	137-137	87-87	125-125	190-190	126-126	107-107	114-114	238-238	132-132	107-107	127-127	ND	130-130	137-137	ND	120-120	220-220	253-253
MLG-053	AZ0931482	Leaf	N 34 54 45.6	W 111 43 41.0	AZ	V. arizonica	ND	132-132	117-138	101-105	100-100	96-120	ND	120-120	137-137	87-87	125-125	196-196	154-156	107-107	114-114	238-238	120-120	107-107	127-127	79-79	124-124	134-140	ND	120-120	205-205	230-230
MLG-054	AZ0931483	Leaf	N 34 54 45.6	W 111 43 41.0	AZ	V. arizonica	ND	132-132	117-138	101-105	100-100	96-98	107-107	120-120	134-137	87-87	125-125	196-196	154-156	107-107	114-114	238-238	120-120	107-107	127-127	79-79	ND	134-140	237-238	120-120	205-205	230-230
MLG-055	AZ0931491	Leaf	N 34 54 45.6	W 111 43 41.0	AZ	V. arizonica	110-112	132-132	138-138	101-105	100-100	96-120	107-107	120-120	137-137	87-87	125-125	196-196	154-156	107-107	114-114	238-238	120-120	107-107	127-127	79-79	ND	131-140	233-233	120-128	205-205	230-230
MLG-056	AZ0941501	Leaf	N 33 45 23.9	W 110 33 52.6	AZ	V. arizonica	110-110	132-132	136-136	101-105	100-100	96-120	113-113	122-122	131-131	87-87	125-125	202-202	168-170	107-107	114-114	238-238	126-126	107-107	127-127	79-79	127-127	ND	233-238	120-120	199-199	238-238
MLG-057	AZ0941503	Leaf	N 33 45 23.9	W 110 33 52.6	AZ	V. arizonica	110-116	132-132	136-136	101-105	100-100	120-120	113-113	122-122	131-131	87-87	125-125	202-202	168-170	107-107	114-114	238-238	126-126	107-107	127-127	79-79	121-127	137-137	238-238	120-122	199-199	238-238
MLG-058	AZ0941504	Leaf	N 33 45 23.9	W 110 33 52.6	AZ	V. arizonica	110-110	132-132	ND	101-105	100-100	94-94	113-113	122-122	ND	87-93	125-125	202-202	148-166	107-107	114-114	238-238	123-123	107-107	127-127	79-79	121-127	134-137	237-238	120-120	ND	256-256
MLG-059	FL0560861	Leaf	N 30 25 19.8	W 84 17 13.9	FL	Unknown	104-104	136-136	117-117	105-112	100-104	96-100	109-111	120-124	131-131	90-90	119-119	193-196	156-158	110-113	120-120	229-229	126-126	119-119	127-127	79-79	121-124	ND	238-238	122-122	196-196	236-250
MLG-060	FL0560862	Leaf	N 30 25 19.8	W 84 17 13.9	FL	Unknown	91-93	136-138	117-117	105-112	100-101	100-100	111-111	120-126	131-131	90-90	119-122	193-196	144-144	110-113	120-120	229-229	123-126	119-119	127-129	79-79	121-124	ND	233-238	122-122	196-196	269-269
MLG-061	FL0560863	Leaf	N 30 25 19.8	W 84 17 13.9	FL	Unknown	104-104	136-136	117-117	109-109	104-114	96-100	109-111	120-124	131-131	90-90	119-119	190-196	156-158	110-113	120-120	229-229	126-126	119-119	127-127	79-79	ND	137-143	238-238	122-122	196-196	236-250
MLG-062	FL0560864	Leaf	N 30 25 19.8	W 84 17 13.9	FL	Unknown	110-110	136-136	130-135	105-112	100-100	96-112	109-109	122-122	134-143	93-93	119-122	187-187	144-146	104-104	117-120	ND	126-126	116-116	122-127	79-79	121-127	131-134	233-238	124-132	187-187	250-250
MLG-063	FL0560865	Leaf	N 30 25 19.8	W 84 17 13.9	FL	Unknown	110-110	ND	130-135	105-114	100-100	112-112	109-109	112-112	134-143	93-96	122-122	187-190	144-146	104-104	117-117	ND	111-126	116-116	122-127	79-79	ND	131-131	238-238	124-124	187-187	250-250
MLG-064	FL0560866	Leaf	N 30 25 19.8	W 84 17 13.9	FL	Unknown	110-110	134-136	130-135	105-114	ND	112-112	109-109	112-122	134-143	93-96	122-122	187-190	144-146	104-104	117-120	ND	111-126	116-116	122-122	79-79	121-127	131-131	238-238	124-124	187-187	250-250
MLG-065	FL05708710	Leaf	N 30 14 2.9	W 81 30 57.3	FL	V. cinerea	110-110	132-134	ND	105-112	100-104	96-112	109-109	122-122	134-143	87-93	119-122	187-187	144-146	104-104	117-120	ND	126-126	116-119	122-127	79-79	121-127	131-134	238-238	124-132	187-187	250-250
MLG-066	FL0570872	Leaf	N 30 14 2.9	W 81 30 57.3	FL	V. cinerea	110-110	136-136	130-135	105-112	100-100	96-112	109-109	122-122	134-143	87-93	122-125	187-187	144-146	104-107	117-120	ND	126-126	116-116	122-127	79-79	121-127	131-134	237-238	124-128	187-187	250-250
MLG-067	FL0570876	Leaf	N 30 14 2.9	W 81 30 57.3	FL	V. cinerea	110-110	138-138	117-117	105-112	100-106	96-110	109-109	122-122	134-143	ND	122-125	187-187	146-148	104-104	117-120	ND	126-126	116-116	122-127	79-79	ND	131-134	233-237	124-132	187-187	250-250
MLG-068	FL0570877	Leaf	N 30 14 2.9	W 81 30 57.3	FL	V. cinerea	110-110	ND	130-135	105-114	100-104	96-112	109-113	112-122	134-143	ND	122-122	187-187	144-152	104-104	117-120	ND	126-126	116-116	122-127	79-79	121-127	131-134	237-238	124-128	187-187	246-250
MLG-069	FL0570878	Leaf	N 30 14 2.9	W 81 30 57.3	FL	V. cinerea	110-110	142-142	117-135	105-112	100-106	96-112	109-109	114-122	134-143	87-93	122-125	187-187	144-146	104-104	117-120	238-238	126-126	116-122	122-127	79-79	121-127	131-134	ND	124-132	187-187	250-250
MLG-070	FL0570879	Leaf	N 30 14 2.9	W 81 30 57.3	FL	V. cinerea	110-110	136-136	130-135	105-112	100-106	96-112	109-109	122-122	134-143	87-93	122-125	187-187	144-146	104-104	117-120	ND	126-126	116-122	122-127	79-79	121-127	131-134	237-237	124-132	187-187	250-250
MLG-071	IN0290371	Leaf	N 40 17 24.12	W 086 52 46.59	IN	Foch	110-110	134-136	134-136	107-116	104-110	94-111	105-119	120-122	131-134	87-87	131-134	199-199	148-148	104-104	123-123	238-241	123-126	110-119	127-129	100-100	121-127	134-143	225-225	126-128	203-203	260-267
MLG-072	IN0290372	Leaf	N 40 17 24.12	W 086 52 46.59	IN	Foch	110-110	134-136	125-138	105-112	106-110	94-120	105-121	118-120	131-134	ND	122-131	193-199	136-146	104-110	120-126	238-241	126-126	110-119	127-135	100-100	121-130	134-143	237-237	122-128	202-202	242-250
MLG-073	IN0290373	Leaf	N 40 17 24.12	W 086 52 46.59	IN	Foch	110-110	136-136	134-134	112-112	106-108	94-120	117-119	120-120	134-134	87-90	131-131	193-193	136-180	104-104	123-123	238-238	123-123	110-110	129-135	100-100	121-121	134-134	233-233	130-130	202-205	230-230
MLG-074	IN0300381	Leaf	N 38 44 17.66	W 087 29 05.10	IN	Frontenal	110-110	136-136	134-134	105-112	ND	94-96	117-119	120-120	134-134	87-90	131-131	193-193	136-180	104-104	123-123	238-238	123-123	110-110	129-135	100-100	121-127	134-134	233-238	130-130	202-205	230-230
MLG-075	IN0300382	Leaf	N 38 44 17.66	W 087 29 05.10	IN	Frontenal	91-91	134-134	123-125	ND	110-110	94-94	ND	116-118	131-131	93-99	122-125	193-193	148-176	107-107	120-126	241-241	135-150	119-119	127-127	79-79	127-127	143-143	237-237	122-124	202-202	238-256
MLG-076	IN0300383	Leaf	N 38 44 17.66	W 087 29 05.10	IN	Frontenal	110-110	134-136	125-132	105-117	108-110	94-102	105-117	116-120	131-134	ND	122-134	193-196	134-134	104-107	120-123	238-238	129-129	110-116	127-127	79-100	121-130	134-143	233-237	126-130	202-202	226-250
MLG-077	IN0310391	Leaf	N 40 24 43.56	W 087 04 27.11	IN	V. riparia	110-110	136-136	134-134	112-112	106-108	113-120	ND	120-120	134-134	87-90	131-131	193-193	ND	104-104	123-123	238-238	123-123	110-110	129-135	100-100	121-121	134-134	233-233	130-130	202-205	230-230
MLG-078	IN0310392	Leaf	N 40 24 43.56	W 087 04 27.11	IN	V. riparia	95-95	134-134	123-125	107-109	104-106	94-94	105-111	116-118	131-131	96-96	125-125	193-199	134-156	107-110	123-123	241-241	126-126	119-119	127-127	79-79	130-130	140-140	237-237	124-124	202-202	250-262
MLG-079	IN0310393	Leaf	N 40 24 43.56	W 087 04 27.11	IN	V. riparia	110-110	136-136	134-136	112-114	106-106	94-104	117-121	120-120	134-134	87-90	128-131	193-193	136-148	104-104	123-123	238-238	123-123	110-110	135-135	100-104	121-121	134-134	237-238	128-128	193-199	250-257
MLG-080	IN0320402	Leaf	N 40 25 34.32	W 086 57 44.43	IN	V. riparia	110-110	136-136	134-136	112-114	106-106	94-94	117-121	120-120	134-134	87-90	128-131	193-193	136-148	104-104	123-123	238-238	123-123	110-110	135-135	100-104	121-121	134-134	237-238	128-128	193-199	250-257
MLG-081	IN0320403	Leaf	N 40 25 34.32	W 086 57 44.43	IN	V. riparia	110-110	136-136	136-138	112-112	106-108	113-115	107-117	118-120	134-134	87-90	131-131	193-196	136-144	104-107	123-123	238-238	123-126	110-110	ND	100-100	121-127	134-134	233-233	128-130	202-202	232-242
MLG-082	IN0330411	Leaf	N 40 25 35.51	W 086 57 39.87	IN	V. riparia	110-110	136-136	134-136	112-114	106-106	102-104	117-121	120-120	134-134	87-90	128-131	193-193	128-128	104-104	123-123	238-238	123-123	110-110	135-135	100-104	121-121	134-134	ND	128-128	193-199	250-257
MLG-083	IN0330412	Leaf	N 40 25 35.51	W 086 57 39.87	IN	V. riparia	110-110	136-136	134-136	112-112	106-108	102-115	117-117	118-118	134-134	87-90	131-131	193-196	136-144	104-104	123-123	238-238	123-123	110-110	132-138	100-100	121-127	134-134	233-233	130-130	202-202	240-252
MLG-084	IN0330413	Leaf	N 40 25 35.51	W 086 57 39.87	IN	V. riparia	110-110	136-136	136-136	105-112	106-108	94-109	117-121	118-120	134-134	87-90	131-131	193-193	136-142	104-104	123-132	238-238	123-123	110-110	132-138	100-100	121-121	134-134	233-233	130-130	202-202	248-248
MLG-085	MA0070071	Leaf	N 42 11 44.5	W 71 49 19.3	MA	V. labrusca	89-116	134-134	121-121	112-112	104-108	94-94	109-109	118-126	131-131	93-99	119-131	196-199	162-166	107-107	120-123	238-241	129-132	119-122	127-127	79-100	127-127	137-140	237-238	124-124	202-205	250-253
MLG-086	MA0080091	Leaf	N 42 07 38.1	W 72 44 36.2	MA	V. riparia	110-112	136-136	132-132	114-114	106-110	111-111	117-121	120-120	134-134	90-90	131-131	205-208	142-144	104-104	123-123	238-238	126-126	110-110	132-135	104-104	121-121	143-143	233-233	130-130	202-202	228-242
MLG-087	MA0080092	Leaf	N 42 07 38.1	W 72 44 36.2	MA	V. riparia	110-110	136-136	132-136	112-114	106-108	96-111	117-117	116-120	134-134	ND	131-131	205-205	144-146	104-104	123-123	238-238	123-126	110-110	135-135	100-104	121-121	134-143	233-233	120-130	193-202	228-257
MLG-088	MA0080093	Leaf	N 42 07 38.1	W 72 44 36.2	MA	V. riparia	110-112	136-136	136-136	112-112	106-110	98-111	117-117	116-120	134-134	90-96	131-131	205-205	142-142	104-104	123-123	238-238	123-126	110-110	135-135	104-104	121-127	ND	233-233	128-128	202-202	228-242
MLG-089	MA0080094	Leaf	N 42 07 38.1	W 72 44 36.2	MA	V. riparia	110-112	136-136	132-140	112-114	108-110	98-111	117-121	120-120	134-134	90-96	131-131	205-205	144-146	104-104	123-123	238-238	126-126	110-110	135-135	104-104	121-121	143-143	233-233	128-128	193-202	228-242
MLG-090	MA0090101	Leaf	N 42 08 48.1	W 72 43 49.3	MA	V. riparia	110-110	136-136	132-136	112-112	106-110	111-111	117-117	120-120	134-134	87-90	131-131	205-205	142-144	104-104	123-123	238-238	123-126	110-110	135-135	104-104	121-121	143-143	233-233	128-130	193-193	228-242
MLG-091	MA0090102	Leaf	N 42 08 48.1	W 72 43 49.3	MA	V. riparia	112-112	136-136	132-136	112-114	106-110	111-111	117-117	120-120	134-134	87-90	131-131	205-205	142-142	104-104	123-123	238-238	123-126	110-110	135-135	104-104	121-127	134-134	233-233	128-130	ND	242-256
MLG-092	MA0090103	Leaf	N 42 08 48.1	W 72 43 49.3	MA	V. riparia	110-112	136-136	132-132	112-112	106-110	111-111	117-121	124-124	134-134	87-90	131-131	205-205	142-142	104-104	123-126	238-238	123-126	110-110	135-135	100-104	121-121	134-143	233-233	128-130	193-202	242-257
MLG-093	MA0090104	Leaf	N 42 08 48.1	W 72 43 49.3	MA	V. riparia	110-110	136-136	132-136	112-114	108-110	111-111	119-121	126-126	134-134	87-90	131-131	205-205	142-142	104-104	ND	238-238	123-126	110-110	135-135	100-100	121-121	143-143	233-233	128-130	193-202	242-242
MLG-094	MA0090105	Leaf	N 42 08 48.1	W 72 43 49.3	MA	V. riparia	110-110	136-136	132-132	112-114	106-110	111-111	119-121	120-120	134-134	87-90	119-119	205-205	170-172	104-104	123-123	238-238	123-123	110-110	135-135	104-104	121-121	143-143	233-233	128-130	193-193	242-256
MLG-095	MN0340421	Leaf	N 45 2 32.1	W 92 51 57.0	MN	Frontenac	110-110	136-136	136-136	105-112	106-108	102-113	117-121	118-120	134-134	87-90	119-131	193-196	ND	104-104	123-123	238-238	123-123	110-110	ND	100-100	121-127	134-134	233-233	130-130	202-202	246-248
MLG-096	MN0340422	Leaf	N 45 2 32.1	W 92 51 57.0	MN	Frontenac	110-110	136-136	134-136	112-112	106-110	111-111	115-117	118-118	134-134	87-90	131-131	193-196	ND	104-104	123-123	238-238	123-123	110-110	132-135	100-100	121-121	134-134	233-233	ND	202-202	230-252
MLG-097	MN0340423	Leaf	N 45 2 32.1	W 92 51 57.0	MN	Frontenac	110-110	136-136	134-136	112-112	108-108	111-113	117-117	118-120	134-134	87-90	119-119	193-196	142-142	104-104	123-123	238-238	123-123	110-110	135-138	100-100	121-121	134-134	233-233	130-130	202-202	226-240
MLG-098	MN0350431	Leaf	N 44 52 1.4	W 93 37 45.7	MN	V. riparia	110-110	136-136	128-134	112-116	108-108	102-111	117-117	118-120	134-134	87-90	131-131	193-196	144-144	104-104	123-123	238-238	123-123	110-110	135-135	100-100	121-127	134-134	233-233	130-130	ND	240-246
MLG-099	MN0350432	Leaf	N 44 52 1.4	W 93 37 45.7	MN	V. riparia	110-110	136-136	134-136	105-114	108-108	113-113	117-117	120-120	134-134	87-90	119-131	193-196	142-142	104-104	123-123	238-238	123-123	110-110	135-138	100-100	121-121	134-134	233-233	130-130	202-202	226-240
MLG-100	MN0350433	Leaf	N 44 52 1.4	W 93 37 45.7	MN	V. riparia	110-110	136-136	129-136	105-114	100-100	96-111	121-126	120-120	134-134	87-90	119-131	187-196	142-146	104-107	123-123	238-238	123-126	110-113	ND	79-100	121-127	134-143	233-233	130-130	193-199	236-246
MLG-101	MN0350441	Leaf	N 44 52 1.4	W 93 37 45.7	MN	Frontenac	110-110	136-136	134-147	112-114	106-108	102-113	113-117	118-124	134-134	87-90	131-131	193-196	136-136	104-104	123-123	238-238	123-123	110-110	135-138	100-100	121-121	134-134	233-233	130-130	202-202	230-246
MLG-102	MN0350442	Leaf	N 44 52 1.4	W 93 37 45.7	MN	Frontenac	110-110	136-136	129-143	105-114	110-110	111-120	117-121	120-120	134-134	87-90	119-131	187-193	142-142	104-107	123-123	238-238	126-126	110-110	132-138	100-100	121-127	134-143	233-233	130-130	193-202	246-246
MLG-103	MN0350443	Leaf	N 44 52 1.4	W 93 37 45.7	MN	Frontenac	110-110	136-136	136-138	105-114	ND	111-120	117-126	120-120	134-134	87-90	119-131	187-196	142-150	104-104	123-123	238-238	123-123	110-110	138-138	100-100	121-121	134-134	233-238	130-130	199-202	246-246
MLG-104	MO0721152	Leaf	N 36 25 55.1	W 89 33 50.1	MO	V. cinerea	ND	132-132	ND	105-112	100-100	96-96	105-105	122-122	134-134	ND	119-119	199-199	132-132	107-107	114-117	238-238	135-138	107-107	129-129	79-79	127-133	131-134	238-238	118-118	196-226	234-234
MLG-105	MO0721153	Leaf	N 36 25 55.1	W 89 33 50.1	MO	V. cinerea	112-112	132-132	117-123	105-112	100-100	96-96	105-105	122-122	134-134	87-93	119-119	199-199	132-132	107-107	114-117	238-238	135-138	107-107	129-129	79-79	121-133	131-131	238-238	118-118	196-226	234-234
MLG-106	MO0721154	Leaf	N 36 25 55.1	W 89 33 50.1	MO	V. cinerea	ND	132-132	117-123	112-112	100-100	96-96	105-105	122-122	134-134	87-93	119-119	199-199	132-132	107-107	114-117	238-238	135-138	107-107	129-129	79-79	133-133	131-131	238-238	118-118	196-226	234-234
MLG-107	MO0721162	Leaf	N 36 25 55.1	W 89 33 50.1	MO	V. cinerea	110-110	132-132	117-125	105-112	100-100	94-96	105-105	124-124	134-134	87-93	119-119	187-199	132-132	107-107	117-117	238-238	135-135	107-107	129-132	79-79	ND	131-134	238-238	118-118	199-226	234-234
MLG-108	MO0721163	Leaf	N 36 25 55.1	W 89 33 50.1	MO	V. cinerea	ND	132-132	ND	112-112	100-100	94-96	105-105	124-124	134-134	87-93	119-119	199-199	132-132	107-107	117-117	238-238	135-135	107-107	129-132	79-79	133-133	131-131	238-238	118-118	199-226	234-234
MLG-109	MO0721165	Leaf	N 36 25 55.1	W 89 33 50.1	MO	V. cinerea	110-110	132-132	117-123	105-112	100-100	94-96	105-105	124-124	134-134	87-93	119-119	187-199	132-132	107-107	117-117	238-238	126-135	107-107	129-132	ND	121-127	131-134	238-238	118-118	199-226	234-234
MLG-110	MO0731171	Leaf	N 36 32 12.5	W 89 35 33.7	MO	V. cinerea	110-112	132-132	117-123	112-112	100-104	96-96	105-105	122-122	134-134	87-93	119-119	196-199	132-134	107-107	117-117	238-238	123-135	107-107	129-129	ND	ND	131-131	238-238	118-118	196-224	234-234
MLG-111	MO0731173	Leaf	N 36 32 12.5	W 89 35 33.7	MO	V. cinerea	114-114	132-132	117-132	105-112	100-100	94-96	105-105	122-122	134-134	87-93	119-119	196-199	132-134	107-107	117-117	238-238	123-135	107-107	129-129	79-79	ND	131-134	238-238	118-118	196-224	234-234
MLG-112	MO0731174	Leaf	N 36 32 12.5	W 89 35 33.7	MO	V. cinerea	110-112	132-132	117-134	112-112	100-100	96-96	105-105	122-122	134-134	87-93	119-119	199-199	132-134	107-107	117-117	238-238	135-135	107-107	129-129	79-79	121-133	131-131	238-238	118-118	196-226	234-234
MLG-113	MO0731181	Leaf	N 36 32 12.5	W 89 35 33.7	MO	V. cinerea	ND	132-132	117-123	112-112	101-101	96-96	105-105	122-122	134-134	87-93	119-119	196-199	132-134	107-107	117-117	238-238	123-135	107-107	129-129	79-79	121-133	131-131	238-238	118-118	196-224	234-234
MLG-114	MO0731182	Leaf	N 36 32 12.5	W 89 35 33.7	MO	V. cinerea	91-93	132-132	ND	112-112	100-100	96-96	105-105	122-122	134-134	87-93	119-119	196-196	134-134	107-107	117-117	238-238	123-123	107-107	129-129	ND	121-121	131-131	ND	118-118	196-196	234-234
MLG-115	MO0731184	Leaf	N 36 32 12.5	W 89 35 33.7	MO	V. cinerea	112-116	132-132	117-117	112-112	101-101	96-96	105-105	122-122	134-134	87-93	119-119	196-199	132-134	107-107	117-117	238-238	123-135	107-107	129-129	ND	133-133	131-131	238-238	118-118	196-224	234-234
MLG-116	MO0741192	Leaf	N 36 49 07.1	W 89 56 28.7	MO	V. cinerea X V. riparia hyb.	91-93	134-134	125-125	105-105	104-104	94-94	105-111	112-112	131-131	84-99	122-131	199-199	134-138	107-107	123-123	241-241	126-129	ND	127-127	79-100	121-127	140-148	237-237	126-128	202-202	232-250
MLG-117	MO0741193	Leaf	N 36 49 07.1	W 89 56 28.7	MO	V. cinerea X V. riparia hyb.	95-114	134-134	117-125	105-105	85-100	94-94	105-109	122-124	131-134	87-87	122-125	193-193	136-158	104-107	123-126	241-241	123-126	119-119	127-127	79-79	ND	134-143	225-237	ND	ND	248-248
MLG-118	MO0741194	Leaf	N 36 49 07.1	W 89 56 28.7	MO	V. cinerea X V. riparia hyb.	95-114	134-138	125-125	105-105	85-106	94-94	105-105	122-124	131-134	87-96	122-125	193-199	136-158	107-107	123-126	241-241	126-135	119-119	127-127	79-79	127-130	140-143	225-237	124-124	202-202	248-248
MLG-119	MO0741195	Leaf	N 36 49 07.1	W 89 56 28.7	MO	V. cinerea X V. riparia hyb.	95-95	134-134	125-125	105-107	104-108	94-94	105-105	120-120	131-131	96-99	122-122	193-199	136-146	107-107	123-123	241-241	129-135	119-119	127-127	79-79	127-127	140-148	237-237	ND	202-202	250-262
MLG-120	MO0741196	Leaf	N 36 49 07.1	W 89 56 28.7	MO	V. cinerea X V. riparia hyb.	95-102	134-134	125-127	105-112	100-104	94-94	105-105	112-120	131-131	96-96	122-122	193-196	132-138	107-107	123-123	241-241	129-135	116-119	127-127	79-79	121-130	134-140	237-237	124-124	202-202	250-250
MLG-121	MO0741201	Leaf	N 36 49 07.1	W 89 56 28.7	MO	V. vulpina hybrid	95-95	134-138	123-125	105-107	104-108	94-94	105-105	112-122	131-131	93-96	122-128	196-196	146-146	107-107	123-123	241-241	123-126	119-119	127-127	79-79	127-127	140-140	237-237	122-126	202-202	250-264
MLG-122	MO0741202	Leaf	N 36 49 07.1	W 89 56 28.7	MO	V. vulpina hybrid	97-97	134-136	123-125	105-112	104-106	94-94	105-105	124-124	131-131	93-105	122-122	193-196	136-140	107-107	123-123	241-241	135-135	119-119	127-127	79-79	121-127	140-140	237-237	ND	202-202	250-250
MLG-123	MO0741203	Leaf	N 36 49 07.1	W 89 56 28.7	MO	V. vulpina hybrid	97-97	134-136	123-125	105-112	104-106	94-94	105-105	124-124	131-131	93-105	122-122	193-196	136-140	107-107	123-123	241-241	135-135	119-119	127-127	79-79	121-127	140-140	237-237	124-126	202-202	250-250
MLG-124	MO0741204	Leaf	N 36 49 07.1	W 89 56 28.7	MO	V. vulpina hybrid	97-97	134-136	123-125	105-105	104-106	94-94	105-105	124-124	131-131	93-105	122-122	193-196	136-140	107-107	123-123	241-241	135-135	119-119	127-127	79-79	127-127	140-140	237-237	124-126	202-202	250-250
MLG-125	MO0751211	Leaf	N 36 52 15.6	W 90 39 08.8	MO	V. aestivalis	95-95	134-134	123-125	105-105	108-110	94-94	105-105	112-118	131-131	96-105	122-125	187-190	134-136	107-107	120-123	241-241	129-129	119-122	127-127	79-79	127-127	140-143	237-237	124-128	211-211	250-271
MLG-126	MO0751212	Leaf	N 36 52 15.6	W 90 39 08.8	MO	V. aestivalis	95-95	134-134	123-125	105-112	ND	94-94	105-105	112-118	131-131	96-105	122-125	187-190	134-136	107-107	120-123	241-241	129-129	119-122	127-127	79-79	121-127	ND	237-237	124-124	211-211	250-271
MLG-127	MO0751213	Leaf	N 36 52 15.6	W 90 39 08.8	MO	V. aestivalis	95-95	134-134	123-125	105-105	108-110	94-94	105-105	112-118	131-131	96-105	122-125	187-190	134-136	107-107	120-123	241-241	129-129	119-122	127-127	79-79	127-127	140-143	237-237	124-124	211-211	250-271
MLG-127	MO0751214	Leaf	N 36 52 15.6	W 90 39 08.8	MO	V. aestivalis	95-95	134-134	123-125	105-105	108-110	94-94	105-105	112-118	131-131	96-105	122-125	187-190	134-136	107-107	120-123	241-241	129-129	119-122	127-127	79-79	127-127	140-143	237-237	124-124	211-211	250-271
MLG-128	MO0751221	Leaf	N 36 52 15.6	W 90 39 08.8	MO	V. aestivalis	93-95	134-134	123-127	105-107	106-110	94-94	105-111	120-120	131-131	99-99	122-122	196-202	136-142	107-107	120-123	241-241	126-126	119-122	127-127	79-79	127-127	140-140	ND	124-124	202-202	236-271
MLG-129	MO0751222	Leaf	N 36 52 15.6	W 90 39 08.8	MO	V. aestivalis	95-95	134-134	123-127	105-112	ND	94-94	105-111	120-120	131-131	99-99	122-122	196-202	136-142	107-107	120-123	241-241	126-126	119-122	127-127	79-79	127-127	134-140	237-238	124-124	202-202	236-271
MLG-130	MO0751223	Leaf	N 36 52 15.6	W 90 39 08.8	MO	V. aestivalis	95-95	134-134	123-127	105-112	106-110	94-94	105-111	120-120	131-131	99-99	122-122	196-202	136-142	107-107	120-123	241-241	126-126	119-122	127-127	79-79	127-127	140-140	233-238	124-124	202-202	236-271
MLG-131	MO0761231	Leaf	N 37 00 13.3	W 91 19 22.9	MO	V. vulpina	91-93	134-134	123-125	105-107	106-110	94-96	105-105	112-118	131-131	93-96	125-131	190-196	140-158	107-107	120-123	241-241	126-135	119-119	127-127	79-79	127-130	140-143	237-237	126-126	ND	232-254
MLG-132	MO0761232	Leaf	N 37 00 13.3	W 91 19 22.9	MO	V. vulpina	95-95	134-134	123-125	105-112	ND	94-94	105-105	112-118	131-131	93-96	125-125	190-196	140-158	107-107	123-123	241-241	132-135	119-119	127-127	79-79	127-130	ND	237-237	124-124	202-202	252-254
MLG-133	MO0761233	Leaf	N 37 00 13.3	W 91 19 22.9	MO	V. vulpina	95-95	134-134	123-125	105-112	100-106	94-94	105-105	112-118	131-131	ND	125-125	190-196	140-158	107-107	123-123	241-241	132-135	119-119	127-127	79-79	127-130	ND	237-237	124-124	202-202	252-254
MLG-134	MO0771241	Leaf	N 37 07 01.9	W 92 06 10.4	MO	V. vulpina	97-97	134-134	125-125	105-112	100-104	94-94	105-105	112-116	131-131	84-96	125-125	187-196	134-134	107-107	123-123	241-241	126-126	119-119	127-127	79-79	127-130	134-140	237-237	126-126	202-202	250-266
MLG-135	MO0771242	Leaf	N 37 07 01.9	W 92 06 10.4	MO	V. vulpina	ND	134-134	125-125	107-112	104-106	94-94	105-111	118-118	131-131	96-99	125-125	190-196	134-146	107-107	123-123	241-241	126-135	119-119	127-127	79-79	127-127	140-140	237-237	122-122	202-202	248-250
MLG-136	MO0771243	Leaf	N 37 07 01.9	W 92 06 10.4	MO	V. vulpina	95-95	134-134	125-129	105-105	108-110	94-94	105-105	110-118	131-131	96-96	125-125	196-196	134-134	107-107	123-123	241-241	126-135	119-119	127-127	79-79	127-130	140-140	237-238	124-124	202-202	250-271
MLG-137	MO0771251	Leaf	N 37 07 01.9	W 92 06 10.4	MO	V. vulpina	93-93	134-134	125-125	105-107	104-108	94-94	105-111	112-118	131-131	96-99	125-125	190-196	134-134	107-107	123-123	241-241	135-135	119-119	127-127	79-79	127-127	143-146	237-237	122-122	202-202	248-248
MLG-138	MO0771253	Leaf	N 37 07 01.9	W 92 06 10.4	MO	V. vulpina	95-95	134-134	125-127	105-112	ND	94-94	105-105	112-118	131-131	96-96	122-125	190-196	134-134	107-107	123-123	241-241	126-126	119-122	127-127	79-79	127-127	140-140	237-237	124-124	202-202	263-271
MLG-139	MO0771254	Leaf	N 37 07 01.9	W 92 06 10.4	MO	V. vulpina	97-97	134-134	123-125	105-105	108-108	94-94	105-105	112-118	131-131	ND	125-125	190-190	134-168	107-107	123-126	241-241	135-135	119-119	127-127	79-79	ND	140-140	237-237	ND	202-202	250-250
MLG-140	MO0781261	Leaf	N 37 09 49.2	W 92 55 08.8	MO	V. vulpina	93-93	134-134	125-127	105-105	108-108	94-94	105-105	112-118	131-131	99-99	125-125	190-196	171-171	107-107	123-126	241-241	135-135	119-119	127-127	ND	127-127	140-140	237-237	124-124	202-202	250-250
MLG-141	MO0781262	Leaf	N 37 09 49.2	W 92 55 08.8	MO	V. vulpina	95-95	134-134	123-123	105-105	104-108	94-94	105-105	112-118	131-131	96-96	ND	193-217	134-134	107-107	ND	241-241	126-135	119-119	127-127	79-79	127-127	140-140	237-237	124-126	202-202	ND
MLG-142	MO0781271	Leaf	N 37 09 49.2	W 92 55 08.8	MO	V. vulpina	93-110	136-136	123-123	105-105	108-108	94-94	105-105	112-118	131-131	87-96	125-125	193-193	168-168	107-107	120-120	241-241	126-129	119-122	127-127	ND	127-127	140-140	237-237	124-124	202-202	256-256
MLG-143	MO0781272	Leaf	N 37 09 49.2	W 92 55 08.8	MO	V. vulpina	95-97	134-134	117-123	105-112	100-104	94-94	105-105	112-112	131-131	96-99	122-125	193-196	134-158	107-107	120-123	241-241	126-135	119-125	127-127	79-100	ND	ND	237-237	124-124	202-202	250-252
MLG-144	MO0781281	Leaf	N 37 09 49.2	W 92 55 08.8	MO	V. vulpina	95-95	134-134	123-125	105-105	108-110	94-94	105-105	112-118	131-131	96-96	122-125	193-217	134-146	107-107	120-120	241-241	126-135	119-119	127-127	79-79	127-127	140-140	237-237	126-126	202-202	250-250
MLG-145	MO0781282	Leaf	N 37 09 49.2	W 92 55 08.8	MO	V. vulpina	95-97	134-134	123-123	105-107	104-106	94-94	105-105	112-112	131-131	96-99	122-125	193-196	134-158	107-107	120-123	241-241	126-135	119-125	127-127	ND	119-127	140-140	237-237	124-126	202-202	250-252
MLG-146	MO0801301	Leaf	N 37 05 16.4	W 94 18 42.1	MO	V. vulpina	93-95	134-134	123-123	107-107	104-106	94-94	105-105	112-112	131-131	96-99	122-125	193-196	134-134	107-107	120-123	241-241	126-135	119-125	127-127	ND	119-127	128-140	237-237	126-126	202-202	252-252
MLG-147	MO0801302	Leaf	N 37 05 16.4	W 94 18 42.1	MO	V. vulpina	95-95	134-134	123-125	105-105	104-106	94-94	105-105	112-118	131-131	99-99	122-125	202-202	138-144	107-107	123-123	241-241	126-135	119-119	127-127	ND	127-130	128-140	237-237	126-126	202-202	271-271
MLG-148	MO0801303	Leaf	N 37 05 16.4	W 94 18 42.1	MO	V. vulpina	112-114	134-136	125-125	105-107	104-104	94-94	105-105	112-118	131-131	96-99	122-125	196-202	124-134	107-107	120-120	241-241	126-126	119-122	127-127	79-79	127-130	128-140	237-237	ND	202-202	266-271
MLG-149	MO0801304	Leaf	N 37 05 16.4	W 94 18 42.1	MO	V. vulpina	95-95	134-134	125-125	105-107	ND	94-94	105-105	112-112	131-131	96-99	122-125	199-199	134-158	107-107	120-123	241-241	126-150	119-119	127-127	79-79	127-127	140-140	238-238	124-124	202-202	248-250
MLG-150	MO0801311	Leaf	N 37 05 16.4	W 94 18 42.1	MO	V. vulpina	91-93	134-136	125-125	105-107	104-104	94-94	105-105	112-118	131-131	96-99	122-125	196-202	124-134	107-107	120-120	241-241	126-126	119-122	127-127	ND	127-130	128-140	237-237	ND	202-202	266-271
MLG-151	MO0801312	Leaf	N 37 05 16.4	W 94 18 42.1	MO	V. vulpina	ND	134-136	125-125	105-107	104-104	94-94	105-105	112-118	131-131	84-99	122-125	196-202	124-124	107-107	120-123	241-241	126-135	119-119	127-127	ND	127-127	128-140	237-237	124-124	202-202	266-271
MLG-152	MO0801313	Leaf	N 37 05 16.4	W 94 18 42.1	MO	V. vulpina	110-110	134-136	125-125	105-112	100-104	94-94	105-105	112-118	131-131	84-99	122-125	196-202	124-124	107-107	120-123	241-241	126-135	119-119	127-127	79-100	127-127	ND	237-237	124-124	202-202	266-271
MLG-153	MO0801314	Leaf	N 37 05 16.4	W 94 18 42.1	MO	V. vulpina	110-110	134-136	117-125	105-112	100-104	94-96	105-105	112-118	131-131	ND	122-125	193-196	124-124	107-107	120-123	241-241	126-126	119-119	127-127	79-79	121-127	134-134	237-238	124-128	ND	236-250
MLG-154	MO0801321	Leaf	N 37 05 16.4	W 94 18 42.1	MO	V. vulpina	91-93	134-134	125-125	109-109	106-108	94-94	105-105	112-112	131-131	96-99	ND	193-196	156-160	107-107	123-123	241-241	ND	113-119	127-127	79-79	127-127	128-140	237-238	126-126	202-202	ND
MLG-155	MO0801322	Leaf	N 37 05 16.4	W 94 18 42.1	MO	V. vulpina	102-102	134-134	125-125	105-109	104-106	94-94	111-111	112-118	131-131	99-99	125-125	190-193	154-160	107-107	120-123	241-241	129-150	119-119	127-127	79-79	127-130	140-140	237-237	124-124	202-202	256-271
MLG-156	MO0801323	Leaf	N 37 05 16.4	W 94 18 42.1	MO	V. vulpina	97-110	134-134	125-125	105-112	100-104	94-94	105-105	112-112	131-131	ND	125-125	196-199	148-150	107-107	120-123	241-241	132-150	110-119	127-127	79-100	ND	134-140	237-238	124-124	202-202	248-250
MLG-155	MO0801324	Leaf	N 37 05 16.4	W 94 18 42.1	MO	V. vulpina	102-102	134-134	125-125	105-109	104-106	94-94	111-111	112-118	131-131	99-99	125-125	190-193	154-160	107-107	120-123	241-241	129-150	119-119	127-127	79-79	127-130	140-140	237-237	124-124	202-202	256-271
MLG-157	NC0500751	Leaf	N 36 01 55.7	W 77 50 34.0	NC	V. vulpina	93-93	142-142	117-117	107-112	100-100	96-96	109-111	112-116	137-137	93-93	119-119	193-193	144-152	107-110	117-117	229-229	123-126	116-116	135-135	79-79	124-124	137-137	238-238	122-122	196-196	257-257
MLG-158	NC0500752	Leaf	N 36 01 55.7	W 77 50 34.0	NC	V. vulpina	93-93	142-142	117-117	107-112	ND	96-96	109-111	112-116	137-137	93-93	119-119	193-193	144-152	107-110	117-117	229-229	123-126	116-116	135-135	79-79	124-124	137-137	238-238	122-122	196-196	257-257
MLG-159	NC0500753	Leaf	N 36 01 55.7	W 77 50 34.0	NC	V. vulpina	93-93	142-142	117-117	107-112	100-100	96-96	109-111	112-116	137-137	93-93	119-119	193-193	144-152	ND	117-117	229-229	123-126	116-116	135-135	79-79	124-124	137-137	238-238	122-122	196-196	257-257
MLG-160	NC0500754	Leaf	N 36 01 55.7	W 77 50 34.0	NC	V. vulpina	93-93	142-142	117-117	107-112	100-100	96-96	109-111	112-116	137-137	93-93	119-119	193-193	144-152	107-110	117-117	229-229	123-126	116-116	135-135	79-79	121-124	137-137	238-238	122-122	196-196	257-257
MLG-161	NC0500761	Leaf	N 36 01 55.7	W 77 50 34.0	NC	V. vulpina	93-93	152-152	117-117	107-107	100-112	96-98	109-109	112-116	137-137	93-93	119-122	193-193	154-156	107-110	117-117	229-229	126-126	116-128	132-132	79-79	127-127	137-143	238-238	122-122	196-196	257-269
MLG-162	NC0500762	Leaf	N 36 01 55.7	W 77 50 34.0	NC	V. vulpina	93-95	142-148	117-121	107-107	100-108	98-98	109-109	116-116	137-137	93-93	119-119	193-193	152-154	107-107	117-117	229-229	123-126	116-116	132-132	79-79	124-124	137-137	238-238	122-122	196-196	257-257
MLG-163	NC0500763	Leaf	N 36 01 55.7	W 77 50 34.0	NC	V. vulpina	93-93	152-152	117-117	107-112	100-112	96-98	109-109	112-116	137-143	93-93	119-119	193-193	144-144	107-107	117-117	229-229	126-132	128-128	129-132	79-79	124-124	137-143	238-238	122-122	196-196	260-260
MLG-164	NC0500764	Leaf	N 36 01 55.7	W 77 50 34.0	NC	V. vulpina	93-93	138-148	117-121	107-107	108-108	96-98	109-109	116-120	137-143	93-93	119-122	193-193	144-152	107-107	117-117	229-229	126-126	122-125	132-132	79-79	124-127	137-137	238-238	122-122	196-196	257-260
MLG-165	NC0510781	Leaf	N 35 45 19.5	W 78 36 46.2	NC	V. vulpina	93-93	148-150	117-117	107-107	100-108	94-96	107-107	112-120	137-140	90-93	116-119	190-193	ND	110-110	117-120	229-229	126-126	119-122	127-129	79-79	124-127	137-143	238-238	ND	196-203	260-260
MLG-166	NC0510782	Leaf	N 35 45 19.5	W 78 36 46.2	NC	V. vulpina	93-93	148-166	117-121	107-107	100-108	94-96	109-113	112-128	137-137	93-93	116-119	193-193	130-154	107-107	117-123	229-229	126-126	122-122	129-129	ND	127-127	137-143	238-238	122-122	196-196	256-271
MLG-167	NC0510783	Leaf	N 35 45 19.5	W 78 36 46.2	NC	V. vulpina	93-93	144-162	117-117	105-107	100-104	96-96	107-113	112-132	137-137	93-93	119-119	193-193	130-154	110-110	117-120	229-229	126-126	119-122	129-129	79-79	124-124	137-143	238-238	122-122	196-203	269-281
MLG-168	NC0510784	Leaf	N 35 45 19.5	W 78 36 46.2	NC	V. vulpina	93-95	150-150	117-117	107-107	104-104	96-96	107-107	132-132	137-137	93-99	119-119	193-193	130-130	110-110	117-120	229-229	126-126	119-122	129-132	79-79	124-127	137-137	238-238	122-122	196-196	260-269
MLG-167	NC0510785	Leaf	N 35 45 19.5	W 78 36 46.2	NC	V. vulpina	93-93	144-162	117-117	105-107	100-104	96-96	107-113	112-132	137-137	93-93	119-119	193-193	130-154	110-110	117-120	229-229	126-126	119-122	129-129	79-79	124-124	137-143	238-238	122-122	196-203	269-281
MLG-169	NC0510791	Leaf	N 35 45 19.5	W 78 36 46.2	NC	V. vulpina	91-93	136-148	117-117	107-107	100-104	96-96	109-113	112-126	140-140	93-93	119-119	193-196	130-134	107-110	117-117	229-229	126-126	122-122	129-129	ND	127-127	137-143	238-238	120-122	196-203	271-271
MLG-170	NC0510792	Leaf	N 35 45 19.5	W 78 36 46.2	NC	V. vulpina	93-95	142-154	117-117	114-116	100-100	94-96	109-113	ND	137-140	93-93	116-119	193-193	148-154	107-107	117-117	229-241	126-126	119-122	129-129	ND	124-127	143-143	238-238	122-122	196-196	257-271
MLG-171	NC0510793	Leaf	N 35 45 19.5	W 78 36 46.2	NC	V. vulpina	93-93	136-162	117-117	107-116	100-100	96-96	113-113	112-120	137-140	93-93	119-119	193-202	121-134	107-110	117-123	229-229	126-126	122-122	129-129	ND	127-127	137-143	238-238	122-122	203-203	271-281
MLG-171	NC0510794	Leaf	N 35 45 19.5	W 78 36 46.2	NC	V. vulpina	93-93	136-162	117-117	107-116	100-100	96-96	113-113	112-120	137-140	93-93	119-119	193-202	121-134	107-110	117-123	229-229	126-126	122-122	129-129	ND	127-127	137-143	238-238	122-122	203-203	271-281
MLG-172	NC0510795	Leaf	N 35 45 19.5	W 78 36 46.2	NC	V. vulpina	93-95	142-154	117-117	114-116	100-100	94-96	109-113	120-120	137-140	93-93	116-119	193-193	148-154	107-107	117-117	229-241	126-126	119-122	129-129	ND	124-127	143-143	238-238	122-122	196-196	257-271
MLG-173	NC0520801	Leaf	N 36 04 37.0	W 79 16 27.7	NC	V. vulpina	91-91	142-146	117-117	107-107	100-110	96-96	107-109	112-126	137-137	93-96	119-119	193-193	130-130	107-110	117-117	229-229	126-126	116-116	127-132	79-79	124-124	137-137	238-238	122-122	196-196	260-260
MLG-174	NC0520802	Leaf	N 36 04 37.0	W 79 16 27.7	NC	V. vulpina	91-93	144-146	117-117	107-118	100-100	96-96	109-111	112-112	137-137	93-93	119-119	193-196	156-160	107-110	117-117	229-229	126-126	116-122	127-132	79-79	124-124	137-143	238-238	122-122	196-196	226-256
MLG-174	NC0520803	Leaf	N 36 04 37.0	W 79 16 27.7	NC	V. vulpina	91-93	144-146	117-117	107-118	100-100	96-96	109-111	112-112	137-137	93-93	119-119	193-196	156-160	107-110	117-117	229-229	126-126	116-122	127-132	79-79	124-124	137-143	238-238	122-122	196-196	226-256
MLG-175	NC0520805	Leaf	N 36 04 37.0	W 79 16 27.7	NC	V. vulpina	ND	144-146	117-117	107-118	100-100	96-96	109-111	112-112	137-137	93-93	119-119	193-196	156-160	107-110	ND	229-229	126-126	116-122	127-132	79-79	124-124	137-143	238-238	122-122	196-196	226-256
MLG-174	NC0520806	Leaf	N 36 04 37.0	W 79 16 27.7	NC	V. vulpina	91-93	144-146	117-117	107-118	100-100	96-96	109-111	112-112	137-137	93-93	119-119	193-196	156-160	107-110	117-117	229-229	126-126	116-122	127-132	79-79	124-124	137-143	238-238	122-122	196-196	226-256
MLG-176	NC0530811	Leaf	N 36 03 53.6	W 80 11 20.5	NC	V. vulpina	93-95	148-150	117-117	107-107	100-100	96-96	109-115	112-112	140-140	93-93	119-122	193-199	128-128	107-110	117-120	229-229	126-138	122-122	132-132	ND	127-127	137-137	238-238	122-122	196-202	260-267
MLG-176	NC0530812	Leaf	N 36 03 53.6	W 80 11 20.5	NC	V. vulpina	93-95	148-150	117-117	107-107	100-100	96-96	109-115	112-112	140-140	93-93	119-122	193-199	128-128	107-110	117-120	229-229	126-138	122-122	132-132	ND	127-127	137-137	238-238	122-122	196-202	260-267
MLG-177	NC0530813	Leaf	N 36 03 53.6	W 80 11 20.5	NC	V. vulpina	91-93	152-162	117-121	107-112	100-104	96-96	109-109	112-124	140-140	87-93	119-119	193-196	150-152	107-107	120-120	229-241	126-135	122-122	132-132	79-79	127-130	137-143	238-238	122-122	203-203	238-250
MLG-178	NC0540821	Leaf	N 35 45 10.5	W 81 03 18.7	NC	V. vulpina	95-116	154-154	121-121	107-109	100-100	94-96	109-113	112-112	128-131	93-96	119-119	196-202	174-174	107-107	117-120	229-229	126-126	116-116	127-132	79-79	124-127	137-137	237-238	122-122	203-203	232-250
MLG-179	NC0540822	Leaf	N 35 45 10.5	W 81 03 18.7	NC	V. vulpina	95-116	154-158	121-121	107-109	100-100	94-96	109-113	112-112	128-131	93-96	119-119	196-202	174-174	ND	117-120	229-229	126-126	116-116	127-132	79-79	124-127	137-137	237-238	122-122	203-203	250-273
MLG-180	NC0540823	Leaf	N 35 45 10.5	W 81 03 18.7	NC	V. vulpina	95-116	154-158	121-121	107-109	100-100	94-96	109-113	112-112	128-131	93-96	119-119	196-202	174-174	107-107	117-120	229-229	126-126	116-116	127-132	79-79	124-127	137-137	237-238	122-122	203-203	250-273
MLG-181	NC0550824	Leaf	N 35 34 59.9	W 82 27 48.8	NC	V. vulpina X V. cinerea hyb.	ND	132-132	ND	112-112	100-100	96-96	105-105	122-122	134-134	93-93	119-131	193-193	132-132	107-107	117-123	238-238	132-132	107-107	115-132	100-100	121-121	131-131	238-238	118-118	196-202	234-236
MLG-182	NC0550832	Leaf	N 35 34 59.9	W 82 27 48.8	NC	V. vulpina X V. cinerea hyb.	110-110	132-132	ND	107-112	100-100	96-96	105-105	122-126	ND	87-93	119-119	193-196	132-132	107-107	ND	238-238	132-132	107-107	115-129	79-79	121-127	131-143	238-238	118-118	224-224	234-236
MLG-183	NC0550841	Leaf	N 35 34 59.9	W 82 27 48.8	NC	V. vulpina X V. cinerea hyb.	ND	132-132	ND	112-112	100-100	96-96	105-105	122-122	134-134	87-93	119-119	193-193	132-132	107-107	117-117	238-238	132-132	107-107	129-129	ND	121-133	131-131	238-238	118-118	196-196	234-236
MLG-184	NC0550842	Leaf	N 35 34 59.9	W 82 27 48.8	NC	V. vulpina X V. cinerea hyb.	110-110	132-132	ND	112-112	100-100	96-96	105-105	122-122	134-134	93-93	119-119	193-196	132-132	107-107	117-117	238-238	132-135	107-107	129-129	ND	121-130	131-131	238-238	118-118	196-224	234-236
MLG-185	NC0550843	Leaf	N 35 34 59.9	W 82 27 48.8	NC	V. vulpina X V. cinerea hyb.	110-122	132-132	ND	112-112	100-100	96-96	105-105	122-122	134-134	87-93	119-119	193-196	132-132	107-107	117-117	238-238	132-132	107-107	115-129	ND	127-130	131-131	238-238	118-118	196-224	236-236
MLG-186	NC0550852	Leaf	N 35 34 59.9	W 82 27 48.8	NC	V. vulpina X V. cinerea hyb.	110-110	132-132	ND	112-112	100-100	96-96	105-105	122-122	134-134	93-93	119-119	193-196	132-132	107-107	117-117	238-238	132-132	107-107	129-129	ND	130-130	131-131	238-238	118-118	196-224	234-234
MLG-187	NM0951511	Leaf	N 33 31 35.8	W 105 26 18.4	NM	V. arizonica	93-110	132-132	136-136	102-102	100-100	94-96	113-113	122-122	131-131	87-87	125-125	202-202	166-168	107-107	114-114	238-238	126-126	107-107	127-127	ND	121-127	137-137	ND	120-120	199-199	238-238
MLG-188	NM0951512	Leaf	N 33 31 35.8	W 105 26 18.4	NM	V. arizonica	110-110	132-132	130-130	101-105	100-100	96-96	113-113	122-122	ND	87-87	125-125	202-202	148-166	107-107	114-114	238-238	123-123	107-107	127-127	79-79	ND	134-137	238-238	120-120	202-202	256-256
MLG-189	NM0951513	Leaf	N 33 31 35.8	W 105 26 18.4	NM	V. arizonica	110-112	132-132	130-130	101-105	100-100	96-96	113-113	122-122	131-131	87-87	125-125	202-202	148-166	107-107	114-114	238-238	123-123	107-107	127-127	79-79	121-127	137-137	238-238	120-120	202-202	256-256
MLG-190	NM0961522	Leaf	N 33 27 04.8	W 105 19 33.1	NM	V. arizonica	110-110	132-132	130-130	101-105	100-100	96-124	113-113	120-122	131-134	87-87	125-125	190-202	148-148	107-107	114-114	238-238	114-126	107-107	127-127	79-79	121-127	137-137	233-238	120-120	202-202	256-256
MLG-191	NM0961523	Leaf	N 33 27 04.8	W 105 19 33.1	NM	V. arizonica	110-110	132-132	130-136	101-105	100-100	96-120	113-113	122-122	131-134	87-87	125-125	190-202	148-148	107-107	114-114	238-238	114-114	107-107	127-127	79-79	121-127	137-137	ND	120-120	199-202	256-256
MLG-192	NM0961524	Leaf	N 33 27 04.8	W 105 19 33.1	NM	V. arizonica	110-110	132-132	138-138	101-101	100-100	102-102	113-113	120-120	137-137	87-87	125-125	202-202	138-138	107-107	114-114	238-238	117-117	107-107	127-127	79-79	121-127	140-140	ND	120-120	202-202	240-240
MLG-193	NM0971531	Leaf	N 33 23 08.3	W 105 29 41.1	NM	V. arizonica	91-93	132-132	131-136	102-102	100-100	120-120	113-113	122-122	131-131	87-87	125-125	202-202	148-148	107-107	114-114	238-238	114-114	107-107	127-127	ND	121-124	137-137	ND	120-120	202-202	256-256
MLG-194	NM0971532	Leaf	N 33 23 08.3	W 105 29 41.1	NM	V. arizonica	110-112	132-132	138-138	101-105	100-100	102-102	113-113	120-120	137-137	87-87	125-125	202-202	138-138	107-107	114-114	238-238	117-117	107-107	127-127	79-79	121-127	140-140	237-238	120-120	202-202	240-240
MLG-195	NM0971533	Leaf	N 33 23 08.3	W 105 29 41.1	NM	V. arizonica	ND	132-132	138-138	101-105	100-100	102-102	113-113	120-120	137-137	87-87	125-125	202-202	136-138	107-107	114-114	238-238	117-117	107-107	127-127	79-79	121-127	140-140	238-238	120-120	202-202	240-240
MLG-196	NM0981542	Leaf	N 32 43 53.2	W 107 52 08.2	NM	V. arizonica	110-110	132-132	117-138	101-105	100-100	104-115	113-113	120-120	137-137	87-87	125-125	196-196	126-138	107-107	114-114	238-238	126-126	107-107	127-127	79-79	121-127	140-140	233-238	120-120	205-205	252-252
MLG-197	NM0981543	Leaf	N 32 43 53.2	W 107 52 08.2	NM	V. arizonica	110-110	132-132	ND	101-105	100-100	104-115	113-113	120-120	137-137	87-87	125-125	196-196	126-138	107-107	114-114	238-238	126-126	107-107	127-127	79-79	ND	134-140	234-238	120-120	220-220	252-252
MLG-198	NM0981544	Leaf	N 32 43 53.2	W 107 52 08.2	NM	V. arizonica	112-112	132-132	138-138	101-105	100-100	104-115	113-113	120-120	137-137	87-87	125-125	196-196	126-138	107-107	114-114	238-238	126-126	107-107	127-127	79-79	ND	140-140	237-238	120-120	220-220	252-252
MLG-199	NM0991551	Leaf	N 33 02 12.3	W 108 09 28.0	NM	V. arizonica	110-110	132-132	136-136	101-105	100-100	96-122	115-115	120-120	137-137	87-87	125-125	196-196	138-138	107-107	114-114	238-238	123-123	107-107	127-127	79-79	ND	140-140	238-238	120-120	205-205	248-252
MLG-200	NM0991552	Leaf	N 33 02 12.3	W 108 09 28.0	NM	V. arizonica	91-93	132-132	138-138	102-102	100-100	104-115	113-113	120-120	137-137	87-87	125-125	196-196	ND	107-107	114-114	238-238	126-126	107-107	127-127	ND	121-121	140-140	ND	120-120	193-202	252-252
MLG-201	NM0991553	Leaf	N 33 02 12.3	W 108 09 28.0	NM	V. arizonica	110-112	132-132	136-136	101-105	100-100	104-104	115-115	120-120	137-137	87-87	125-125	196-196	ND	107-107	114-114	238-238	123-126	107-107	127-127	ND	121-124	134-140	237-238	120-120	196-205	248-252
MLG-202	NM0991554	Leaf	N 33 02 12.3	W 108 12 00.2	NM	V. arizonica	112-112	132-132	117-136	101-105	100-100	104-122	115-115	120-120	137-137	87-87	125-125	196-196	138-138	107-107	114-114	238-238	126-126	107-107	127-127	79-79	121-127	140-140	237-238	120-120	205-205	252-254
MLG-203	NM1001561	Leaf	N 33 02 05.1	W 108 12 00.2	NM	V. arizonica	91-93	132-132	136-136	101-101	100-100	104-122	115-115	120-120	137-137	87-87	125-125	196-196	ND	107-107	114-114	238-238	123-126	107-107	127-127	ND	121-121	140-140	ND	120-120	205-205	248-254
MLG-204	NM1001562	Leaf	N 33 02 05.1	W 108 12 00.2	NM	V. arizonica	ND	132-132	117-142	ND	100-104	104-104	115-115	120-120	137-137	87-87	125-125	199-199	126-138	107-107	114-114	238-238	123-123	107-107	127-127	79-79	121-127	ND	237-238	120-120	205-205	254-254
MLG-205	NM1001563	Leaf	N 33 02 05.1	W 108 12 00.2	NM	V. arizonica	110-110	132-132	140-140	101-105	100-100	104-104	113-113	120-120	137-137	87-87	125-125	202-202	138-138	107-107	114-114	238-238	126-126	107-107	127-127	79-100	121-127	140-140	237-237	120-120	199-205	240-240
MLG-206	NM1001564	Leaf	N 33 02 05.1	W 108 12 00.2	NM	V. arizonica	ND	132-132	123-140	101-105	100-100	104-104	113-113	120-120	137-137	87-87	125-125	202-202	ND	107-107	114-114	238-238	126-126	107-107	127-127	79-79	121-127	134-140	237-238	120-120	199-199	240-240
MLG-207	NM1011572	Leaf	N 33 02 06.1	W 108 13 43.5	NM	V. arizonica	112-112	ND	117-140	101-105	100-100	104-104	113-113	ND	137-137	87-87	125-125	202-202	126-138	107-107	114-114	238-238	126-126	107-107	127-127	79-79	121-127	140-140	237-238	120-120	ND	240-240
MLG-208	NM1021581	Leaf	N 32 46 11.2	W 108 16 32.5	NM	V. arizonica	110-110	132-132	140-140	101-105	100-100	104-104	113-113	120-120	137-137	87-87	125-125	202-202	126-138	107-107	114-114	238-238	126-126	107-107	127-127	79-79	121-121	140-140	237-238	120-120	199-205	252-252
MLG-209	NM1021583	Leaf	N 32 46 11.2	W 108 16 32.5	NM	V. arizonica	93-93	136-136	117-117	105-112	100-114	94-98	109-111	120-120	131-140	87-90	119-119	187-193	128-164	110-113	120-120	229-229	123-126	119-119	129-129	79-79	121-127	137-143	238-242	122-122	196-203	ND
MLG-210	NM1031592	Leaf	N 32 46 12.2	W 108 16 32.1	NM	V. arizonica	93-93	136-136	117-117	105-112	100-114	94-98	109-111	120-120	131-140	87-90	119-119	187-193	128-164	110-113	120-120	229-229	123-126	119-119	127-129	79-79	121-127	137-143	238-242	122-122	196-203	ND
MLG-211	NM1041601	Leaf	N 32 46 13.8	W 108 16 31.9	NM	V. arizonica	91-93	132-132	140-140	101-101	100-100	104-104	113-113	120-120	137-137	87-87	125-125	202-202	ND	107-107	114-114	238-238	126-126	107-107	127-127	ND	121-121	140-140	ND	120-120	205-205	240-252
MLG-212	NM1041602	Leaf	N 32 46 13.8	W 108 16 31.9	NM	V. arizonica	ND	136-138	117-117	105-112	ND	96-96	111-111	122-124	131-131	87-99	119-119	196-196	136-138	104-110	120-120	229-229	126-126	116-119	127-129	79-79	121-124	ND	238-242	122-122	196-196	236-236
MLG-213	NY0100111	Leaf	N 42 25 23.6	W 73 32 52.9	NY	V. riparia	110-110	136-136	135-135	ND	106-106	111-111	117-117	ND	134-134	87-90	119-131	205-205	142-142	104-104	120-123	238-238	117-126	110-110	132-135	100-104	121-121	143-143	233-233	128-128	202-205	232-277
MLG-214	NY0110121	Leaf	N 42 39 45.9	W 73 44 27.3	NY	V. riparia	110-112	136-136	132-132	ND	106-110	111-111	117-119	116-120	134-134	87-90	131-131	205-208	146-146	104-104	123-126	238-238	123-126	110-110	132-132	100-100	121-121	137-143	233-233	130-130	ND	242-244
MLG-215	NY0110122	Leaf	N 42 39 45.9	W 73 44 27.3	NY	V. riparia	110-110	136-136	132-132	112-114	106-108	115-124	117-119	116-120	134-134	87-90	131-131	205-205	142-150	104-104	123-123	238-238	123-123	110-110	138-138	100-104	121-121	134-143	233-233	128-128	193-202	242-246
MLG-216	NY0110123	Leaf	N 42 39 45.9	W 73 44 27.3	NY	V. riparia	110-112	136-136	132-132	112-112	106-110	111-111	ND	116-120	134-134	87-90	131-131	205-208	146-146	104-104	123-132	238-238	126-126	110-110	132-132	100-100	121-121	137-143	233-233	130-130	193-205	242-244
MLG-217	NY0110131	Leaf	N 42 39 45.9	W 73 44 27.3	NY	V. riparia	110-112	136-136	132-134	112-112	106-106	111-111	117-119	118-120	134-134	90-90	131-131	205-205	142-160	104-104	123-123	238-238	123-123	110-110	124-135	104-104	121-121	143-143	233-233	128-128	193-202	228-244
MLG-218	NY0110132	Leaf	N 42 39 45.9	W 73 44 27.3	NY	V. riparia	112-112	136-136	132-136	112-112	106-110	98-111	117-117	118-120	134-134	87-90	131-131	205-205	156-160	104-104	123-132	238-238	123-126	110-110	132-135	100-104	121-121	137-143	233-233	130-130	193-193	228-228
MLG-219	NY0110141	Leaf	N 42 39 45.9	W 73 44 27.3	NY	V. riparia	110-112	136-136	132-138	112-112	106-106	98-111	119-119	120-120	134-134	87-90	131-131	205-208	146-146	104-104	123-123	238-238	123-126	110-110	132-135	104-104	121-121	137-143	233-233	128-130	ND	228-242
MLG-220	NY0120151	Leaf	N 42 54 21.1	W 71 33 58.7	NY	V. riparia	112-112	136-136	132-132	112-112	106-106	111-111	119-124	120-126	134-134	87-87	131-131	193-205	ND	104-104	123-123	238-238	123-126	110-110	135-138	104-104	121-121	137-143	233-233	ND	193-202	228-244
MLG-221	NY0120161	Leaf	N 42 54 11.3	W 71 34 25.1	NY	V. riparia	ND	136-136	134-136	112-112	106-106	98-113	119-119	114-114	134-134	87-90	131-131	ND	164-166	104-104	123-132	238-238	123-126	110-110	135-138	100-104	121-121	137-143	233-233	128-128	193-202	228-263
MLG-222	NY0120162	Leaf	N 42 54 11.3	W 71 34 25.1	NY	V. riparia	110-110	136-136	136-136	112-112	ND	111-113	119-119	114-120	134-134	87-90	131-131	193-205	164-166	104-104	123-123	238-238	123-126	110-110	135-138	100-104	121-121	137-143	233-233	128-128	193-202	228-230
MLG-223	NY0140191	Leaf	N 42 57 35.8	W 76 08 20.2	NY	V. riparia	110-110	136-136	136-136	112-112	106-108	111-120	117-119	118-120	134-134	90-90	131-131	205-208	142-164	ND	123-126	238-238	ND	110-110	132-138	100-100	ND	134-143	233-233	128-130	205-205	228-253
MLG-224	NY0140192	Leaf	N 42 57 35.8	W 76 08 20.2	NY	V. riparia	110-110	136-136	117-136	112-114	106-108	98-113	117-119	120-120	134-143	90-90	131-131	190-211	158-158	104-104	123-132	238-238	123-126	110-110	138-138	100-100	121-121	134-143	233-233	128-130	ND	254-254
MLG-225	NY0140193	Leaf	N 42 57 35.8	W 76 08 20.2	NY	V. riparia	110-110	136-136	136-136	112-112	106-108	111-120	117-119	118-120	ND	90-90	131-131	205-208	142-164	104-104	123-132	238-238	123-123	110-110	132-138	100-100	121-121	134-143	233-233	128-130	205-205	228-254
MLG-226	NY0150201	Leaf	N 42 07 47.9	W 75 54 17.6	NY	V. riparia	110-110	136-136	ND	112-112	106-106	111-115	117-117	114-114	134-134	87-90	119-131	196-196	166-168	104-104	123-123	238-238	126-126	110-110	ND	100-104	121-121	134-137	229-229	128-130	ND	232-242
MLG-227	NY0160211	Leaf	N 42 52 27.6	W 77 00 32.9	NY	V. riparia	110-110	136-136	134-134	112-114	106-106	98-113	117-119	114-114	134-134	87-90	131-131	193-196	150-168	104-104	123-132	238-238	123-123	110-110	135-138	104-104	121-121	ND	233-237	128-130	205-205	242-257
MLG-228	NY0160212	Leaf	N 42 52 27.6	W 77 00 32.9	NY	V. riparia	110-110	136-136	132-136	112-114	106-106	113-120	117-119	114-120	131-134	87-90	131-134	193-196	154-156	104-104	123-123	238-238	123-126	110-110	132-135	100-104	121-121	134-143	233-233	128-130	193-205	232-256
MLG-229	NY0160213	Leaf	N 42 52 27.6	W 77 00 32.9	NY	V. riparia	110-110	ND	132-138	112-116	108-112	98-111	117-117	114-120	134-134	87-87	131-131	193-205	156-158	104-104	123-123	238-238	123-126	110-110	132-132	104-104	121-121	134-134	229-233	130-130	193-205	242-253
MLG-230	NY0170221	Leaf	N 42 42 46.7	W 76 53 36.4	NY	V. riparia	110-110	136-138	132-134	112-112	106-108	98-98	117-119	120-126	134-134	87-90	131-134	193-196	142-158	104-104	123-123	238-238	123-126	110-110	132-135	100-100	121-127	134-143	229-229	128-128	202-205	253-253
MLG-231	NY0170222	Leaf	N 42 42 46.7	W 76 53 36.4	NY	V. riparia	110-110	136-138	132-134	112-112	106-108	98-98	117-119	120-126	134-134	87-90	131-134	193-196	142-158	104-104	123-123	238-238	123-126	110-110	132-135	100-100	121-127	134-143	229-229	128-128	202-205	254-263
MLG-232	NY0170223	Leaf	N 42 42 46.7	W 76 53 36.4	NY	V. riparia	110-110	136-138	132-134	112-112	106-108	98-98	117-119	120-126	134-134	87-90	131-134	193-196	142-158	104-104	123-132	238-238	123-126	110-110	132-135	100-100	121-127	134-143	229-229	128-128	202-205	254-263
MLG-233	NY0180231	Leaf	N 42 34 53.9	W 76 39 41.5	NY	V. riparia	110-110	136-136	136-136	112-112	106-106	98-111	117-117	120-126	134-134	87-90	131-131	193-205	158-168	104-104	123-126	238-238	123-123	110-110	135-138	100-100	121-121	134-143	233-237	128-130	193-193	242-242
MLG-234	NY0180232	Leaf	N 42 34 53.9	W 76 39 41.5	NY	V. riparia	110-110	136-136	132-136	112-112	106-108	98-113	117-119	114-120	134-134	87-87	131-131	205-205	160-164	104-104	123-132	238-238	123-123	110-110	132-138	100-100	121-127	134-143	233-233	128-128	202-202	230-254
MLG-235	NY0180233	Leaf	N 42 34 53.9	W 76 39 41.5	NY	V. riparia	110-110	136-136	132-136	ND	106-108	113-113	117-119	114-120	134-134	87-87	131-131	205-205	160-164	104-104	123-132	238-238	123-123	110-110	132-138	100-100	121-127	134-143	233-233	128-128	202-202	230-254
MLG-236	NY0190241	Leaf	N 42 29 47.7	W 76 32 30.4	NY	V. riparia	110-110	136-136	134-136	114-114	106-106	98-113	117-119	120-128	134-134	87-90	131-131	193-205	140-160	104-104	123-123	238-238	123-126	110-110	132-135	100-104	121-121	134-143	233-237	128-128	193-205	228-244
MLG-237	NY0190242	Leaf	N 42 29 47.7	W 76 32 30.4	NY	V. riparia	110-110	136-136	134-136	114-114	106-106	98-113	117-119	120-128	134-134	87-87	131-131	193-205	140-160	104-104	123-123	238-238	123-126	110-110	132-135	100-104	121-121	134-143	233-237	128-128	193-205	228-244
MLG-238	NY0190243	Leaf	N 42 29 47.7	W 76 32 30.4	NY	V. riparia	110-110	136-136	134-136	114-114	ND	98-113	117-119	120-128	134-134	87-90	131-131	193-205	140-160	104-104	123-123	238-238	123-126	ND	132-135	100-104	121-121	134-143	233-237	128-128	193-205	228-244
MLG-239	NY0200251	Leaf	N 42 27 7.5	W 76 30 50.8	NY	V. riparia	110-110	136-138	136-136	112-112	106-108	98-115	119-119	120-120	134-134	87-90	131-131	205-205	142-170	104-104	123-123	238-238	123-126	110-110	135-135	104-104	121-121	134-143	233-237	128-128	202-211	244-260
MLG-240	NY0200252	Leaf	N 42 27 7.5	W 76 30 50.8	NY	V. riparia	110-110	136-138	136-136	112-112	106-108	98-115	119-119	120-120	134-134	87-90	131-131	205-205	142-170	104-104	123-123	238-238	123-126	110-110	135-135	ND	121-121	134-143	233-237	128-128	202-211	244-260
MLG-239	NY0200253	Leaf	N 42 27 7.5	W 76 30 50.8	NY	V. riparia	110-110	136-138	136-136	112-112	106-108	98-115	119-119	120-120	134-134	87-90	131-131	205-205	142-170	104-104	123-123	238-238	123-126	110-110	135-135	104-104	121-121	134-143	233-237	128-128	202-211	244-260
MLG-241	NY0210261	Leaf	N 43 13.308	W 077 47.550	NY	V. riparia	110-110	136-136	134-134	112-112	106-106	98-111	117-117	120-120	134-134	87-90	131-131	205-205	156-158	104-104	123-123	238-238	123-123	110-110	138-138	100-100	121-127	134-134	233-233	128-128	205-205	242-242
MLG-242	NY0210262	Leaf	N 43 13.308	W 077 47.550	NY	V. riparia	110-110	136-136	134-134	112-114	106-106	111-120	117-121	114-120	134-134	ND	131-131	193-193	142-162	104-104	123-123	238-238	123-123	110-110	132-138	100-100	ND	134-134	233-233	128-128	202-202	253-257
MLG-243	NY0220271	Leaf	N 43 15.747	W 077 52.670	NY	V. riparia	110-110	136-136	134-134	112-114	106-108	98-111	117-121	114-114	134-134	87-90	131-131	196-205	158-162	104-104	123-123	238-238	123-123	110-110	132-135	100-104	121-121	134-134	ND	128-128	202-205	232-257
MLG-244	NY0220272	Leaf	N 43 15.747	W 077 52.670	NY	V. riparia	110-110	136-136	132-134	114-114	106-106	111-111	117-117	114-120	134-134	90-90	131-131	193-205	158-162	104-104	123-123	238-238	123-123	110-110	135-135	100-104	121-121	134-134	233-233	128-128	202-205	242-252
MLG-244	NY0220273	Leaf	N 43 15.747	W 077 52.670	NY	V. riparia	110-110	136-136	132-134	114-114	106-106	111-111	117-117	114-120	134-134	90-90	131-131	193-205	158-162	104-104	123-123	238-238	123-123	110-110	135-135	100-104	121-121	134-134	233-233	128-128	202-205	242-252
MLG-245	NY0230281	Leaf	N 43 17.739	W 077 57.036	NY	V. riparia	110-110	136-136	110-134	114-116	106-106	98-111	117-117	114-120	134-134	87-90	131-131	193-205	154-156	104-104	123-123	238-238	123-123	110-110	138-138	100-100	121-121	134-134	233-233	128-128	202-205	230-253
MLG-246	NY0230282	Leaf	N 43 17.739	W 077 57.036	NY	V. riparia	110-110	136-136	110-134	112-114	106-106	98-113	117-121	114-120	134-134	87-90	131-131	193-205	150-158	104-104	123-123	238-238	123-123	110-110	ND	100-100	121-121	134-143	233-233	128-128	ND	242-254
MLG-247	NY0230283	Leaf	N 43 17.739	W 077 57.036	NY	V. riparia	110-110	136-136	110-134	112-114	106-106	111-111	117-117	124-124	134-134	87-90	131-131	193-193	158-160	104-104	123-123	238-238	123-123	110-110	135-135	100-100	121-121	134-143	233-233	128-128	205-205	250-254
MLG-248	NY0240291	Leaf	N 43 20.426	W 078 08.978	NY	V. riparia	110-110	136-136	134-136	114-116	106-106	98-113	117-117	114-120	134-134	87-90	131-131	196-205	158-158	104-104	123-123	238-238	123-123	110-110	132-138	100-100	121-121	134-134	233-233	128-128	202-202	228-257
MLG-249	NY0240292	Leaf	N 43 20.426	W 078 08.978	NY	V. riparia	110-110	136-136	134-136	112-114	106-106	113-113	117-117	114-120	134-134	87-90	131-131	196-196	150-154	104-104	123-123	238-238	123-123	110-110	132-138	100-100	121-127	134-134	233-233	128-128	193-205	228-238
MLG-248	NY0240293	Leaf	N 43 20.426	W 078 08.978	NY	V. riparia	110-110	136-136	134-136	114-116	106-106	98-113	117-117	114-120	134-134	87-90	131-131	196-205	158-158	104-104	123-123	238-238	123-123	110-110	132-138	100-100	121-121	134-134	233-233	128-128	202-202	228-257
MLG-250	NY0250301	Leaf	N 43 21.033	W 078 18.448	NY	V. riparia	110-110	136-136	134-136	112-114	106-106	111-111	117-119	114-120	134-134	87-90	131-131	193-196	154-156	104-104	123-123	ND	123-123	110-110	132-132	100-100	121-127	134-134	233-233	128-128	193-205	250-250
MLG-251	NY0250302	Leaf	N 43 21.033	W 078 18.448	NY	V. riparia	110-110	136-136	136-136	112-114	106-108	113-113	117-117	120-128	134-134	87-90	131-131	199-205	150-158	104-104	123-123	238-238	123-129	110-110	132-138	100-100	121-127	134-134	233-233	128-128	193-205	250-250
MLG-252	NY0250303	Leaf	N 43 21.033	W 078 18.448	NY	V. riparia	110-110	136-136	134-136	112-114	108-108	113-113	117-117	120-128	134-134	87-90	131-131	193-205	154-162	104-104	123-123	238-238	123-123	110-110	132-138	100-100	121-121	134-134	233-233	128-128	202-205	242-250
MLG-253	OH0280351	Leaf	N 39 25 25.8	W 81 25 38.8	OH	V. vulpina	116-116	134-134	125-125	105-107	104-110	94-94	105-111	112-122	131-131	84-96	122-125	196-196	134-134	107-110	120-123	241-241	126-126	119-122	127-127	79-79	127-127	143-143	237-237	124-124	202-202	232-250
MLG-254	OH0280361	Leaf	N 39 25 25.8	W 81 25 38.8	OH	V. vulpina	ND	ND	125-125	105-107	110-110	94-94	105-111	118-122	131-131	96-99	125-125	193-193	134-134	107-107	120-123	241-241	126-135	116-119	121-127	ND	127-127	143-143	237-237	124-124	202-202	250-256
MLG-255	OH0280362	Leaf	N 39 25 25.8	W 81 25 38.8	OH	V. vulpina	91-91	134-134	123-125	105-105	110-110	94-94	105-105	122-122	131-131	96-96	125-125	193-196	134-174	107-107	120-123	241-241	132-135	113-119	127-127	ND	127-127	137-140	237-237	124-124	ND	252-279
MLG-256	OH0280363	Leaf	N 39 25 25.8	W 81 25 38.8	OH	V. vulpina	91-91	134-134	123-125	105-105	110-110	94-94	105-105	122-122	131-131	96-96	125-125	193-196	134-174	107-107	120-123	241-241	132-135	113-119	127-127	ND	127-127	137-140	237-237	124-124	202-202	252-279
MLG-257	OK0811331	Leaf	N 35 30 54.5	W 95 05 05.9	OK	V. vulpina	95-95	134-134	125-125	105-105	104-106	94-94	105-111	118-120	131-131	96-99	125-125	193-205	154-154	107-107	120-123	241-241	135-150	119-119	127-127	ND	127-130	140-143	237-237	124-124	202-208	248-256
MLG-258	OK0811332	Leaf	N 35 30 54.5	W 95 05 05.9	OK	V. vulpina	102-102	134-134	125-125	105-107	104-106	94-94	105-111	112-118	131-131	99-99	125-125	193-196	138-148	107-107	120-123	241-241	135-150	110-119	127-127	79-79	127-130	140-140	237-237	124-124	202-202	ND
MLG-259	OK0811333	Leaf	N 35 30 54.5	W 95 05 05.9	OK	V. vulpina	102-102	134-134	125-125	105-112	104-106	94-111	105-105	116-124	131-131	96-96	122-122	193-196	134-148	107-107	120-123	241-241	135-138	116-119	127-127	79-79	119-130	143-145	237-237	124-126	202-202	250-271
MLG-260	OK0811334	Leaf	N 35 30 54.5	W 95 05 05.9	OK	V. vulpina	102-102	134-134	125-125	105-112	104-106	94-94	105-105	116-124	131-131	96-96	122-122	193-196	134-148	107-107	120-123	241-241	135-138	116-119	127-127	79-79	119-130	143-145	237-237	124-126	202-202	250-271
MLG-260	OK0811335	Leaf	N 35 30 54.5	W 95 05 05.9	OK	V. vulpina	102-102	134-134	125-125	105-112	104-106	94-94	105-105	116-124	131-131	96-96	122-122	193-196	134-148	107-107	120-123	241-241	135-138	116-119	127-127	79-79	119-130	143-145	237-237	124-126	202-202	250-271
MLG-261	OK0821341	Leaf	N 33 51 10.5	W 96 30 49.4	OK	V. vulpina	93-93	134-134	125-125	105-112	104-106	94-94	105-105	116-124	131-131	96-96	122-122	193-196	134-148	107-107	120-123	241-241	135-138	116-119	127-127	79-79	119-130	143-145	237-237	124-126	202-202	250-271
MLG-262	OK0821342	Leaf	N 33 51 10.5	W 96 30 49.4	OK	V. vulpina	102-102	134-134	125-125	105-112	104-106	94-94	105-105	116-124	131-131	96-96	122-122	193-196	134-148	107-107	120-123	241-241	135-138	116-119	127-127	ND	119-130	143-145	237-237	124-126	202-202	250-271
MLG-263	OK0821343	Leaf	N 33 51 10.5	W 96 30 49.4	OK	V. vulpina	110-110	134-134	123-125	105-109	104-108	94-94	105-105	120-120	131-131	96-96	122-122	193-196	144-146	107-107	123-123	241-241	126-135	119-122	127-127	79-79	127-130	140-140	237-237	126-126	202-202	246-250
MLG-263	OK0821344	Leaf	N 33 51 10.5	W 96 30 49.4	OK	V. vulpina	110-110	134-134	123-125	105-109	104-108	94-94	105-105	120-120	131-131	96-96	122-122	193-196	144-146	107-107	123-123	241-241	126-135	119-122	127-127	79-79	127-130	140-140	237-237	126-126	202-202	246-250
MLG-263	OK0821345	Leaf	N 33 51 10.5	W 96 30 49.4	OK	V. vulpina	110-110	134-134	123-125	105-109	104-108	94-94	105-105	120-120	131-131	96-96	122-122	193-196	144-146	107-107	123-123	241-241	126-135	119-122	127-127	79-79	127-130	140-140	237-237	126-126	202-202	246-250
MLG-264	PA0260311	Leaf	N 41 04 52.9	W 76 51 45.0	PA	V. riparia	110-110	136-136	132-134	113-117	106-108	98-122	107-119	120-122	134-134	87-90	116-131	205-205	148-150	104-104	123-126	238-238	126-126	110-110	132-132	100-104	121-121	143-143	233-233	128-130	193-205	242-260
MLG-265	PA0270321	Leaf	N 40 34 30.6	W 78 19 52.3	PA	V. riparia	110-110	136-136	132-132	112-113	106-108	113-113	117-117	120-120	134-134	87-90	131-131	205-205	146-146	104-104	123-126	238-238	126-126	110-110	138-138	100-100	121-127	128-143	233-233	128-128	205-205	230-242
MLG-266	PA0270322	Leaf	N 40 34 30.6	W 78 19 52.3	PA	V. riparia	110-110	136-136	132-132	112-112	106-108	98-113	117-117	120-120	134-134	87-90	131-131	205-205	146-146	104-104	132-132	238-238	126-126	110-110	138-138	100-100	121-127	143-143	233-233	128-128	ND	230-242
MLG-267	PA0270323	Leaf	N 40 34 30.6	W 78 19 52.3	PA	V. riparia	110-110	136-136	132-132	112-112	106-108	98-113	117-117	120-120	134-134	87-90	131-131	205-205	146-146	104-104	123-132	238-238	126-126	110-110	138-138	100-100	121-127	143-143	233-233	128-128	205-205	230-242
MLG-267	PA0270324	Leaf	N 40 34 30.6	W 78 19 52.3	PA	V. riparia	110-110	136-136	132-132	112-112	106-108	98-113	117-117	120-120	134-134	87-90	131-131	205-205	146-146	104-104	123-132	238-238	126-126	110-110	138-138	100-100	121-127	143-143	233-233	128-128	205-205	230-242
MLG-268	PA0270325	Leaf	N 40 34 30.6	W 78 19 52.3	PA	V. riparia	110-110	136-136	132-136	112-114	106-106	ND	117-117	120-120	134-137	87-90	131-131	196-205	160-160	104-104	123-132	238-238	ND	110-110	135-138	100-100	121-121	134-143	233-233	128-128	193-202	230-232
MLG-269	PA0270331	Leaf	N 40 34 30.6	W 78 19 52.3	PA	V. riparia	110-110	136-136	132-136	112-112	106-106	111-111	117-119	120-120	134-134	87-87	122-131	205-205	160-180	104-104	123-123	238-238	126-126	110-110	135-138	100-104	121-121	143-143	233-233	130-130	205-205	230-242
MLG-270	PA0270332	Leaf	N 40 34 30.6	W 78 19 52.3	PA	V. riparia	110-110	136-136	136-136	112-112	106-108	98-111	117-117	120-120	134-134	87-87	131-131	205-205	160-160	104-104	123-132	238-238	126-126	110-110	138-138	100-100	127-127	134-143	233-233	128-128	196-205	232-242
MLG-271	PA0270333	Leaf	N 40 34 30.6	W 78 19 52.3	PA	V. riparia	110-110	136-136	136-136	112-112	106-108	98-111	117-117	ND	134-134	87-87	131-131	193-205	160-160	104-104	123-132	238-238	126-126	110-110	138-138	100-100	127-127	134-143	233-233	128-128	196-205	232-242
MLG-272	PA0270341	Leaf	N 40 34 30.6	W 78 19 52.3	PA	V. riparia	110-110	136-136	132-136	113-113	106-106	117-117	117-117	120-120	134-134	87-87	131-131	196-211	180-180	104-104	123-123	238-238	126-126	110-110	138-138	100-100	121-127	143-143	233-233	128-128	196-205	232-242
MLG-273	SD0360451	Leaf	N 44 18 12.70	W 096 46 58.00	SD	Seyval	110-110	136-136	128-136	114-114	108-110	111-120	121-126	120-120	134-134	87-90	131-131	187-196	142-146	104-107	123-123	238-238	123-126	110-110	132-138	100-100	121-127	143-143	233-233	130-130	193-199	236-246
MLG-274	SD0360452	Leaf	N 44 18 12.70	W 096 46 58.00	SD	Seyval	104-110	136-136	134-136	105-114	100-110	96-113	121-126	120-120	134-134	87-87	119-131	196-199	142-142	104-104	123-123	238-238	123-126	110-110	127-138	79-100	121-127	134-143	ND	130-130	193-202	246-246
MLG-275	SD0360461	Leaf	N 44 18 12.70	W 096 46 58.00	SD	Valiant	110-110	136-136	138-143	112-114	110-110	111-120	121-121	120-120	134-134	87-90	131-134	187-187	142-150	104-104	123-123	238-238	126-126	110-110	132-138	100-100	121-127	134-134	233-233	130-130	193-199	236-246
MLG-276	SD0360462	Leaf	N 44 18 12.70	W 096 46 58.00	SD	Valiant	110-110	136-136	129-138	105-114	100-110	111-120	117-117	120-124	134-134	87-87	119-119	187-196	142-142	104-104	123-123	238-238	123-126	110-110	127-138	79-100	121-121	134-134	ND	130-130	193-193	246-246
MLG-277	SD0370471	Leaf	N 44 19 22.54	W 096 44 36.61	SD	Unk Hybrid	110-110	136-136	128-136	112-114	110-110	113-113	117-117	120-120	134-134	87-90	131-131	187-196	144-146	104-107	123-123	238-238	126-126	110-110	132-132	100-100	127-127	134-143	233-233	130-130	193-199	236-246
MLG-278	SD0370472	Leaf	N 44 19 22.54	W 096 44 36.61	SD	Unk Hybrid	110-110	136-136	136-138	ND	110-110	113-120	117-117	120-124	134-134	87-87	119-131	187-193	142-144	104-104	123-123	238-238	123-126	110-110	132-138	100-100	127-127	134-143	233-233	130-130	193-199	230-246
MLG-279	SD0370473	Leaf	N 44 19 22.54	W 096 44 36.61	SD	Unk Hybrid	110-110	136-136	134-136	105-114	ND	113-113	117-117	124-124	134-134	87-90	119-131	187-199	144-146	104-107	123-123	238-238	126-126	110-110	132-138	100-100	121-127	134-143	233-233	130-130	193-193	236-246
MLG-280	SD0370481	Leaf	N 44 19 22.54	W 096 44 36.61	SD	La Crescent	104-110	136-136	134-136	105-114	ND	113-120	121-126	120-124	134-134	87-87	119-131	193-196	142-142	104-104	123-123	238-238	123-126	110-110	127-138	100-100	ND	134-143	237-238	130-130	202-202	246-246
MLG-281	SD0370482	Leaf	N 44 19 22.54	W 096 44 36.61	SD	La Crescent	110-110	136-136	136-138	112-114	110-110	113-120	117-117	120-124	134-134	87-87	131-131	187-193	142-144	104-104	123-123	238-238	123-126	110-110	132-138	100-100	127-127	134-143	233-233	130-130	193-199	230-246
MLG-282	SD0370483	Leaf	N 44 19 22.54	W 096 44 36.61	SD	La Crescent	104-110	136-136	134-136	105-114	110-110	113-120	117-121	120-124	134-134	87-87	119-131	193-196	142-142	104-107	123-123	238-238	123-126	110-110	132-138	100-100	121-127	134-143	233-233	130-130	193-202	236-246
MLG-283	SD0370491	Leaf	N 44 19 22.54	W 096 44 36.61	SD	Rip37 X Seyval	104-110	136-136	136-138	114-114	110-110	113-113	117-121	120-120	134-134	87-87	131-131	187-193	142-142	104-104	123-123	ND	123-126	110-110	138-138	100-100	121-121	134-134	233-233	130-130	199-202	246-246
MLG-284	SD0370492	Leaf	N 44 19 22.54	W 096 44 36.61	SD	Rip37 X Seyval	104-110	136-136	136-136	105-114	110-110	120-120	117-121	120-120	134-134	87-87	119-131	193-196	142-144	104-104	123-123	238-238	126-126	110-110	132-138	100-100	127-127	134-134	233-233	130-130	202-202	236-246
MLG-279	SD0370493	Leaf	N 44 19 22.54	W 096 44 36.61	SD	Rip37 X Seyval	110-110	136-136	134-136	105-114	ND	113-113	117-117	124-124	134-134	87-90	119-131	187-199	144-146	104-107	123-123	238-238	126-126	110-110	132-138	100-100	121-127	134-143	233-233	130-130	193-193	236-246
MLG-285	SD0370501	Leaf	N 44 19 22.54	W 096 44 36.61	SD	MN1131	110-110	132-132	117-136	105-112	100-100	109-109	113-113	118-118	ND	87-87	119-125	202-202	146-146	107-107	114-114	238-238	120-120	107-107	127-127	79-79	121-127	134-140	238-238	120-120	205-205	248-248
MLG-286	SD0370502	Leaf	N 44 19 22.54	W 096 44 36.61	SD	MN1131	110-110	132-132	117-136	105-112	100-100	96-109	113-113	118-118	131-134	87-87	119-119	ND	146-146	107-107	114-114	238-238	120-120	107-107	127-127	79-79	121-127	ND	237-238	120-120	205-205	248-248
MLG-287	SD0370503	Leaf	N 44 19 22.54	W 096 44 36.61	SD	MN1131	110-110	136-136	136-138	114-114	106-110	113-120	117-117	120-120	134-134	87-90	131-131	193-193	142-144	104-107	123-123	238-238	126-126	110-110	138-138	100-100	121-127	134-143	233-233	130-130	202-202	236-246
MLG-288	SD0370504	Leaf	N 44 19 22.54	W 096 44 36.61	SD	MN1131	110-112	132-132	117-136	105-112	100-100	109-109	113-113	118-118	134-137	87-87	119-125	202-202	146-146	107-107	114-114	238-238	120-120	107-107	127-127	79-79	ND	134-140	237-238	120-120	205-205	248-248
MLG-289	TN0580881	Leaf	N 35 59 53.9	W 83 42 01.2	TN	V. vulpina	116-116	134-145	123-123	107-107	104-108	94-94	109-111	114-120	131-131	84-93	122-128	193-208	134-148	107-107	114-117	241-241	126-132	113-119	ND	79-79	127-127	137-140	230-238	124-124	202-202	250-250
MLG-290	TN0580882	Leaf	N 35 59 53.9	W 83 42 01.2	TN	V. vulpina	116-116	134-145	123-123	107-107	104-108	94-94	109-111	114-120	131-131	84-93	122-128	193-208	134-148	107-107	114-117	241-241	126-132	113-119	127-127	79-79	127-127	137-140	ND	124-124	202-202	250-250
MLG-291	TN0580891	Leaf	N 35 59 53.9	W 83 42 01.2	TN	V. vulpina	116-116	145-145	123-136	109-112	106-116	94-94	111-111	110-114	131-131	87-93	122-122	193-208	148-154	107-107	114-120	241-241	129-129	116-119	127-127	79-79	127-130	137-146	238-238	122-124	202-202	250-250
MLG-292	TN0580892	Leaf	N 35 59 53.9	W 83 42 01.2	TN	V. vulpina	116-116	134-134	123-125	107-109	104-118	94-94	111-111	110-114	131-131	93-96	122-122	187-193	152-154	107-110	114-120	241-241	129-129	116-116	127-127	79-79	127-130	143-146	237-238	122-122	202-208	250-250
MLG-293	TN0580893	Leaf	N 35 59 53.9	W 83 42 01.2	TN	V. vulpina	114-114	134-134	125-125	105-112	106-116	94-94	109-111	110-114	131-131	93-105	122-122	193-196	148-154	ND	117-120	241-241	129-129	116-119	127-127	79-79	127-127	137-137	ND	124-124	202-208	250-250
MLG-294	TN0580901	Leaf	N 35 59 53.9	W 83 42 01.2	TN	V. vulpina	122-122	134-145	123-125	107-109	104-122	94-94	111-111	112-112	131-131	93-96	122-122	193-196	ND	107-107	114-120	241-241	129-132	116-116	127-127	79-79	127-130	140-143	238-238	ND	202-202	250-262
MLG-295	TN0580902	Leaf	N 35 59 53.9	W 83 42 01.2	TN	V. vulpina	122-122	134-145	123-125	107-109	104-122	94-94	111-111	112-112	131-131	93-96	122-122	193-196	154-156	107-107	114-120	241-241	129-132	116-116	127-127	79-79	127-130	140-143	237-238	124-124	202-202	250-262
MLG-296	TN0590911	Leaf	N 35 54 54.1	W 84 05 31.3	TN	V. vulpina	120-120	134-134	123-125	107-112	120-122	94-94	111-111	114-120	131-131	102-105	122-122	193-199	168-172	107-107	120-120	241-241	117-126	116-116	127-127	79-79	127-127	137-140	ND	122-126	202-202	250-256
MLG-297	TN0590912	Leaf	N 35 54 54.1	W 84 05 31.3	TN	V. vulpina	120-120	134-134	123-125	107-112	120-122	94-94	111-111	114-120	131-131	105-105	122-122	193-199	168-172	107-107	120-120	241-241	117-126	116-116	127-127	79-79	127-127	137-140	ND	122-122	202-202	250-256
MLG-298	TN0590913	Leaf	N 35 54 54.1	W 84 05 31.3	TN	V. vulpina	114-122	134-136	121-123	107-109	104-106	94-94	109-111	114-114	131-131	96-96	122-122	193-193	152-174	107-110	120-120	241-241	117-129	116-122	127-127	79-79	127-127	137-143	237-237	122-126	202-202	248-256
MLG-299	TN0590914	Leaf	N 35 54 54.1	W 84 05 31.3	TN	V. vulpina	120-122	134-134	123-125	107-109	104-118	94-94	113-113	114-120	131-131	96-105	122-122	193-193	158-164	107-107	114-117	241-241	126-132	113-125	127-127	79-79	127-127	137-140	230-238	126-126	202-202	256-256
MLG-300	TN0590921	Leaf	N 35 54 54.1	W 84 05 31.3	TN	V. vulpina	116-116	134-134	123-123	105-109	104-106	94-94	111-111	118-120	131-131	96-105	122-125	193-196	154-156	107-107	114-120	241-241	129-132	113-116	127-127	79-79	127-127	137-137	230-238	122-124	202-202	248-250
MLG-301	TN0590922	Leaf	N 35 54 54.1	W 84 05 31.3	TN	V. vulpina	122-122	134-145	123-125	105-105	104-108	94-94	105-113	114-132	131-131	87-93	122-122	193-193	146-172	107-107	120-120	241-241	126-132	116-116	127-127	79-79	127-127	137-143	237-238	122-122	202-202	250-250
MLG-302	TN0590923	Leaf	N 35 54 54.1	W 84 05 31.3	TN	V. vulpina	116-122	134-134	123-123	105-105	106-108	94-94	111-113	110-120	131-131	96-96	122-122	193-196	146-146	107-107	120-120	241-241	132-132	116-116	127-127	79-79	127-127	137-137	ND	122-124	202-202	250-250
MLG-301	TN0590924	Leaf	N 35 54 54.1	W 84 05 31.3	TN	V. vulpina	122-122	134-145	123-125	105-105	104-108	94-94	105-113	114-132	131-131	87-93	122-122	193-193	146-172	107-107	120-120	241-241	126-132	116-116	127-127	79-79	127-127	137-143	237-238	122-122	202-202	250-250
MLG-303	TN0590925	Leaf	N 35 54 54.1	W 84 05 31.3	TN	V. vulpina	105-105	134-145	123-130	109-109	116-118	94-94	111-113	114-118	131-131	96-99	122-125	187-193	146-170	107-107	117-123	241-241	126-147	116-116	127-127	79-79	127-127	137-140	230-238	122-126	202-202	250-252
MLG-304	TN0590931	Leaf	N 35 54 54.1	W 84 05 31.3	TN	V. vulpina	116-118	134-134	123-130	107-112	120-120	94-94	111-113	120-120	131-131	96-96	122-122	193-196	140-140	107-107	120-120	241-241	126-126	116-122	127-127	79-79	127-127	137-140	238-238	124-126	202-202	250-250
MLG-305	TN0590932	Leaf	N 35 54 54.1	W 84 05 31.3	TN	V. vulpina	120-122	145-145	125-130	107-109	106-116	94-94	111-111	116-118	131-131	93-96	122-122	193-196	146-170	107-107	117-120	241-241	120-126	116-116	127-127	79-79	127-127	137-143	237-238	122-126	202-202	250-250
MLG-306	TN0590933	Leaf	N 35 54 54.1	W 84 05 31.3	TN	V. vulpina	118-122	134-134	123-130	105-112	104-106	94-94	111-113	114-120	131-131	96-99	122-122	193-196	140-154	107-107	114-120	241-241	126-126	ND	127-127	79-79	127-127	137-140	237-238	122-126	202-202	236-250
MLG-307	TN0590934	Leaf	N 35 54 54.1	W 84 05 31.3	TN	V. vulpina	122-122	134-145	123-130	107-107	116-122	94-94	111-111	118-118	131-131	96-105	122-122	187-196	140-168	104-107	120-120	241-241	117-123	116-122	127-127	79-79	127-127	143-143	ND	122-126	202-202	250-252
MLG-308	TN0590935	Leaf	N 35 54 54.1	W 84 05 31.3	TN	V. vulpina	120-122	145-145	125-130	107-109	106-106	94-94	111-111	116-118	131-131	93-96	122-122	193-196	146-170	107-107	117-120	241-241	120-126	116-116	127-127	79-79	127-127	137-143	237-238	122-126	202-202	250-250
MLG-309	TN0600941	Leaf	N 35 55 42.6	W 84 54 46.0	TN	V. labrusca	116-118	134-134	123-123	107-107	106-112	94-94	111-115	110-110	125-131	96-96	122-122	193-196	150-152	107-107	120-123	241-241	132-138	119-119	127-127	79-79	127-127	144-147	237-238	124-124	202-202	250-271
MLG-310	TN0600942	Leaf	N 35 55 42.6	W 84 54 46.0	TN	V. labrusca	116-118	134-134	123-123	107-107	106-112	94-94	111-115	110-110	125-131	96-96	122-122	193-196	150-152	107-107	120-123	241-241	132-138	119-119	127-127	79-79	127-127	143-146	237-238	124-124	202-202	250-271
MLG-310	TN0600943	Leaf	N 35 55 42.6	W 84 54 46.0	TN	V. labrusca	116-118	134-134	123-123	107-107	106-112	94-94	111-115	110-110	125-131	96-96	122-122	193-196	150-152	107-107	120-123	241-241	132-138	119-119	127-127	79-79	127-127	143-146	237-238	124-124	202-202	250-271
MLG-311	TN0600951	Leaf	N 35 55 42.6	W 84 54 46.0	TN	V. labrusca	116-118	134-134	123-123	107-107	112-120	94-94	105-115	110-110	125-131	96-96	122-122	193-196	150-152	107-107	120-120	241-241	126-126	119-119	127-127	79-79	127-127	144-147	237-237	124-124	202-202	271-271
MLG-312	TN0600952	Leaf	N 35 55 42.6	W 84 54 46.0	TN	V. labrusca	116-116	134-134	123-123	107-107	104-120	94-94	111-115	110-110	131-131	ND	122-122	187-196	150-150	107-107	120-120	241-241	126-135	119-119	127-127	79-79	127-127	146-146	237-238	124-126	202-202	250-271
MLG-313	TN0600953	Leaf	N 35 55 42.6	W 84 54 46.0	TN	V. labrusca	116-118	134-134	123-123	107-107	112-120	94-94	105-115	110-110	125-131	87-96	122-122	193-196	150-152	107-107	120-120	241-241	126-126	119-119	127-127	79-79	127-127	143-146	237-237	ND	202-202	271-271
MLG-314	TN0600954	Leaf	N 35 55 42.6	W 84 54 46.0	TN	V. labrusca	116-118	134-134	123-123	107-107	104-120	94-94	111-111	110-110	131-131	96-96	122-122	193-193	150-152	107-107	120-120	241-241	126-126	119-119	127-127	ND	127-127	143-146	237-237	122-126	202-202	271-271
MLG-315	TN0610961	Leaf	N 36 05 30.5	W 85 43 27.5	TN	V. vulpina X V. cinerea hyb.	ND	132-132	130-132	112-112	100-100	96-96	105-105	122-122	ND	87-93	119-131	199-199	132-132	107-107	117-123	238-238	123-123	107-107	129-132	ND	121-121	131-134	238-238	118-118	196-196	234-234
MLG-316	TN0610962	Leaf	N 36 05 30.5	W 85 43 27.5	TN	V. vulpina X V. cinerea hyb.	110-110	132-132	ND	112-112	100-100	96-96	105-105	122-122	134-134	87-93	119-119	199-199	132-132	107-107	117-117	238-238	ND	107-107	129-129	ND	121-133	131-131	238-238	118-118	196-224	234-234
MLG-317	TN0610963	Leaf	N 36 05 30.5	W 85 43 27.5	TN	V. vulpina X V. cinerea hyb.	110-110	132-132	ND	112-112	100-100	96-96	105-105	122-122	131-134	87-93	119-119	199-199	132-132	107-107	117-117	238-238	123-123	107-107	129-129	ND	127-130	131-131	238-238	118-118	196-224	234-234
MLG-318	TN0610964	Leaf	N 36 05 30.5	W 85 43 27.5	TN	V. vulpina X V. cinerea hyb.	116-116	132-132	ND	112-112	100-100	96-96	105-105	122-122	134-134	87-93	119-119	199-199	ND	107-107	117-117	238-238	123-123	107-107	129-129	ND	127-130	131-131	238-238	118-118	196-196	234-234
MLG-319	TN0610965	Leaf	N 36 05 30.5	W 85 43 27.5	TN	V. vulpina X V. cinerea hyb.	ND	132-132	ND	112-112	100-100	96-96	105-105	122-122	134-134	87-93	119-119	199-199	132-132	107-107	117-117	238-238	123-123	107-107	129-129	ND	127-127	131-131	238-238	118-118	196-224	234-234
MLG-320	TN0620971	Leaf	N 36 10 15.9	W 86 35 59.8	TN	V. vulpina X V. riparia hyb.	102-102	134-134	125-125	105-109	110-120	94-94	105-111	114-124	131-131	96-96	125-125	190-196	134-142	107-107	120-123	241-241	123-129	119-122	127-127	79-79	127-127	137-140	238-238	128-130	202-202	250-262
MLG-321	TN0620972	Leaf	N 36 10 15.9	W 86 35 59.8	TN	V. vulpina X V. riparia hyb.	116-116	134-134	123-125	105-105	106-108	94-94	105-107	122-124	131-131	96-96	125-128	193-193	136-136	107-107	123-126	241-241	126-129	119-119	127-127	79-79	124-127	ND	237-237	124-124	193-202	256-260
MLG-322	TN0620973	Leaf	N 36 10 15.9	W 86 35 59.8	TN	V. vulpina X V. riparia hyb.	116-116	134-134	123-125	105-105	106-108	94-94	105-107	122-124	131-131	96-96	125-128	193-193	136-136	107-107	123-126	241-241	126-129	119-119	127-127	79-79	124-127	137-143	237-237	124-124	193-202	256-260
MLG-323	TN0620974	Leaf	N 36 10 15.9	W 86 35 59.8	TN	V. vulpina X V. riparia hyb.	95-95	134-134	125-125	105-109	108-112	94-94	105-113	120-124	131-131	87-99	125-125	190-193	134-152	107-107	120-126	241-241	132-135	119-119	127-127	ND	127-127	143-146	237-237	126-126	202-202	250-256
MLG-324	TN0630981	Leaf	N 36 10 16.9	W 86 36 7.4	TN	V. vulpina X V. riparia hyb.	93-102	134-134	125-125	105-109	104-104	94-94	105-105	114-118	125-131	87-99	122-125	193-196	134-136	107-107	114-120	241-241	126-135	119-119	127-127	79-79	127-127	140-140	237-237	124-124	202-202	232-260
MLG-325	TN0630982	Leaf	N 36 10 16.9	W 86 36 7.4	TN	V. vulpina X V. riparia hyb.	102-102	134-134	125-125	105-109	104-104	94-94	105-105	114-118	125-131	87-99	122-125	193-196	134-136	107-107	114-120	241-241	126-135	119-119	127-127	79-79	127-127	140-140	237-237	124-124	202-202	250-250
MLG-326	TN0630983	Leaf	N 36 10 16.9	W 86 36 7.4	TN	V. vulpina X V. riparia hyb.	102-102	134-134	125-125	105-109	104-104	94-94	105-105	114-118	125-131	87-99	ND	193-196	136-136	107-107	ND	241-241	126-135	119-119	127-127	79-79	127-127	140-140	237-237	124-124	202-202	ND
MLG-325	TN0630984	Leaf	N 36 10 16.9	W 86 36 7.4	TN	V. vulpina X V. riparia hyb.	102-102	134-134	125-125	105-109	104-104	94-94	105-105	114-118	125-131	87-99	122-125	193-196	134-136	107-107	114-120	241-241	126-135	119-119	127-127	79-79	127-127	140-140	237-237	124-124	202-202	250-250
MLG-327	TN0630991	Leaf	N 36 10 16.9	W 86 36 7.4	TN	V. vulpina X V. riparia hyb.	93-116	134-134	125-125	105-105	110-110	94-94	105-105	114-116	131-131	96-96	122-122	193-199	134-136	107-107	120-123	241-241	123-123	116-116	127-127	ND	127-127	140-140	237-237	122-124	202-202	250-250
MLG-328	TN0630992	Leaf	N 36 10 16.9	W 86 36 7.4	TN	V. vulpina X V. riparia hyb.	95-95	134-134	125-125	105-105	104-106	94-94	105-105	118-124	131-131	96-99	125-125	199-199	134-134	107-107	120-123	241-241	123-126	116-119	127-127	79-79	127-127	ND	237-237	124-124	202-202	250-250
MLG-329	TN0630993	Leaf	N 36 10 16.9	W 86 36 7.4	TN	V. vulpina X V. riparia hyb.	91-91	134-134	125-125	105-105	106-110	94-94	105-111	122-124	131-131	96-99	122-125	193-196	134-134	107-107	123-129	241-241	123-126	119-119	127-127	79-79	127-127	140-140	237-237	124-124	202-202	250-256
MLG-330	TN0630994	Leaf	N 36 10 16.9	W 86 36 7.4	TN	V. vulpina X V. riparia hyb.	95-95	134-134	125-125	105-105	104-106	94-94	105-105	118-124	131-131	96-99	125-125	199-199	134-134	107-107	120-123	241-241	123-126	116-119	127-127	79-79	127-127	140-140	237-237	124-124	202-202	250-250
MLG-331	TN0641001	Leaf	N 36 00 45.7	W 87 22 50.4	TN	V. vulpina X V. riparia hyb.	116-116	134-134	123-125	105-105	104-112	94-94	105-105	114-116	131-137	84-87	122-122	193-196	132-136	107-113	123-123	241-241	123-126	119-119	127-127	79-79	127-127	140-143	237-237	124-124	202-202	250-250
MLG-332	TN0641002	Leaf	N 36 00 45.7	W 87 22 50.4	TN	V. vulpina X V. riparia hyb.	116-116	134-134	123-125	105-105	104-112	94-94	105-105	114-116	131-137	84-87	122-122	193-196	132-136	107-113	123-123	241-241	123-126	119-119	ND	79-79	127-127	140-143	237-237	124-124	202-202	250-250
MLG-331	TN0641003	Leaf	N 36 00 45.7	W 87 22 50.4	TN	V. vulpina X V. riparia hyb.	116-116	134-134	123-125	105-105	104-112	94-94	105-105	114-116	131-137	84-87	122-122	193-196	132-136	107-113	123-123	241-241	123-126	119-119	127-127	79-79	127-127	140-143	237-237	124-124	202-202	250-250
MLG-331	TN0641004	Leaf	N 36 00 45.7	W 87 22 50.4	TN	V. vulpina X V. riparia hyb.	116-116	134-134	123-125	105-105	104-112	94-94	105-105	114-116	131-137	84-87	122-122	193-196	132-136	107-113	123-123	241-241	123-126	119-119	127-127	79-79	127-127	140-143	237-237	124-124	202-202	250-250
MLG-333	TN0641011	Leaf	N 36 00 45.7	W 87 22 50.4	TN	V. vulpina X V. riparia hyb.	95-116	134-138	123-125	105-107	104-106	94-94	105-111	118-120	131-131	87-96	125-125	196-202	136-142	107-113	123-123	241-241	123-123	119-119	127-127	79-79	127-127	140-140	240-240	124-126	202-202	256-256
MLG-334	TN0641012	Leaf	N 36 00 45.7	W 87 22 50.4	TN	V. vulpina X V. riparia hyb.	95-97	134-134	123-125	105-107	110-112	94-94	105-105	114-120	ND	87-87	122-125	193-193	132-138	110-113	120-123	241-241	123-132	116-119	127-127	ND	127-127	140-143	237-237	124-130	202-202	250-256
MLG-335	TN0641013	Leaf	N 36 00 45.7	W 87 22 50.4	TN	V. vulpina X V. riparia hyb.	95-116	134-138	123-125	105-107	104-106	94-94	105-111	118-120	131-131	87-96	125-125	196-202	136-142	107-113	123-123	241-241	123-123	119-119	127-127	79-79	127-127	140-140	ND	124-126	202-202	256-256
MLG-336	TN0641014	Leaf	N 36 00 45.7	W 87 22 50.4	TN	V. vulpina X V. riparia hyb.	95-95	134-134	123-125	105-105	108-112	94-94	105-105	114-116	131-131	87-96	122-125	193-199	132-136	110-113	120-123	241-241	123-132	119-119	127-127	ND	127-127	140-143	237-237	124-130	202-202	248-250
MLG-337	TN0651021	Leaf	N 35 50 14.2	W 88 05 01.7	TN	V. riparia	93-95	134-134	125-125	105-107	104-106	94-94	105-105	116-126	131-131	96-96	122-128	187-199	134-142	107-107	123-123	241-241	132-135	116-119	127-129	79-79	127-127	ND	237-237	124-124	202-202	250-250
MLG-338	TN0651022	Leaf	N 35 50 14.2	W 88 05 01.7	TN	V. riparia	91-95	134-134	125-129	105-112	104-108	94-96	105-111	116-116	131-137	96-99	ND	202-202	142-158	107-107	123-123	241-241	126-132	119-119	127-127	79-79	ND	131-140	237-237	122-124	202-202	250-256
MLG-339	TN0661031	Leaf	N 35 37 40.7	W 88 58 05.7	TN	V. vulpina	91-93	134-134	125-125	105-105	104-104	94-94	105-111	116-120	131-131	99-105	122-122	190-199	134-148	107-107	117-123	241-241	132-132	116-122	127-127	79-79	127-130	140-143	237-237	124-124	202-202	250-262
MLG-340	TN0661032	Leaf	N 35 37 40.7	W 88 58 05.7	TN	V. vulpina	91-91	134-134	125-125	105-105	104-104	94-94	105-111	116-120	131-131	99-105	122-122	190-199	134-148	107-107	117-123	241-241	132-132	116-122	127-127	79-79	127-130	140-143	237-237	122-124	202-202	250-262
MLG-341	TN0661033	Leaf	N 35 37 40.7	W 88 58 05.7	TN	V. vulpina	95-95	134-134	123-123	105-107	104-110	94-94	105-105	114-116	131-131	87-96	125-125	199-199	134-150	107-107	120-123	241-241	132-132	119-122	127-127	79-79	127-130	140-152	237-237	126-126	202-202	250-271
MLG-342	TN0661034	Leaf	N 35 37 40.7	W 88 58 05.7	TN	V. vulpina	94-95	134-134	123-125	105-105	104-106	94-94	105-105	120-124	131-131	87-87	125-125	196-196	134-134	107-107	117-123	241-241	117-126	116-119	127-127	79-79	127-127	140-143	237-237	124-124	202-202	250-256
MLG-343	TN0661035	Leaf	N 35 37 40.7	W 88 58 05.7	TN	V. vulpina	97-97	134-134	123-125	105-105	104-114	94-94	105-113	114-120	131-131	87-87	122-125	193-193	134-156	107-107	123-126	241-241	126-138	116-119	127-127	79-79	127-127	140-140	237-237	124-124	202-202	248-254
MLG-344	TN0661041	Leaf	N 35 37 40.7	W 88 58 05.7	TN	V. vulpina	91-93	134-134	123-123	105-105	104-104	94-94	105-113	120-122	131-131	93-99	122-125	196-199	146-146	107-107	117-120	241-241	129-132	119-119	127-127	79-79	127-127	140-143	237-237	126-126	202-202	250-250
MLG-345	TN0661042	Leaf	N 35 37 40.7	W 88 58 05.7	TN	V. vulpina	91-91	134-134	123-123	105-105	104-104	94-94	105-113	120-122	131-131	93-99	122-125	196-199	146-146	107-107	117-120	241-241	129-132	119-119	127-127	79-79	127-127	140-143	237-237	126-126	202-202	248-250
MLG-345	TN0661043	Leaf	N 35 37 40.7	W 88 58 05.7	TN	V. vulpina	91-91	134-134	123-123	105-105	104-104	94-94	105-113	120-122	131-131	93-99	122-125	196-199	146-146	107-107	117-120	241-241	129-132	119-119	127-127	79-79	127-127	140-143	237-237	126-126	202-202	248-250
MLG-346	TN0661044	Leaf	N 35 37 40.7	W 88 58 05.7	TN	V. vulpina	89-95	134-134	123-127	107-107	104-104	94-94	105-105	118-120	131-131	87-93	125-125	193-193	134-158	107-107	123-123	241-241	135-135	119-119	127-127	79-79	127-127	140-140	237-237	126-126	202-202	257-260
MLG-347	TN0661045	Leaf	N 35 37 40.7	W 88 58 05.7	TN	V. vulpina	91-91	134-134	123-123	105-105	104-104	94-94	105-113	120-122	131-131	93-99	122-125	196-199	146-160	107-107	117-120	241-241	129-132	119-119	127-127	79-79	127-127	140-143	237-237	126-126	202-202	248-250
MLG-348	TN0661051	Leaf	N 35 37 40.7	W 88 58 05.7	TN	V. vulpina	95-95	134-134	123-123	105-109	104-104	94-94	105-115	114-118	131-131	ND	122-128	199-199	134-142	107-107	123-123	241-241	129-135	116-122	127-127	79-79	127-130	140-140	237-237	126-126	202-202	250-256
MLG-349	TN0661052	Leaf	N 35 37 40.7	W 88 58 05.7	TN	V. vulpina	95-95	134-134	123-123	105-109	104-104	94-94	105-115	114-118	131-131	96-99	122-128	199-199	134-142	107-107	123-123	241-241	129-135	116-122	127-127	79-79	127-130	140-140	237-237	124-124	202-202	250-256
MLG-349	TN0661053	Leaf	N 35 37 40.7	W 88 58 05.7	TN	V. vulpina	95-95	134-134	123-123	105-109	104-104	94-94	105-115	114-118	131-131	96-99	122-128	199-199	134-142	107-107	123-123	241-241	129-135	116-122	127-127	79-79	127-130	140-140	237-237	124-124	202-202	250-256
MLG-349	TN0661054	Leaf	N 35 37 40.7	W 88 58 05.7	TN	V. vulpina	95-95	134-134	123-123	105-109	104-104	94-94	105-115	114-118	131-131	96-99	122-128	199-199	134-142	107-107	123-123	241-241	129-135	116-122	127-127	79-79	127-130	140-140	237-237	124-124	202-202	250-256
MLG-350	TN0661055	Leaf	N 35 37 40.7	W 88 58 05.7	TN	V. vulpina	95-95	134-134	123-123	105-109	104-104	94-94	105-115	114-118	131-131	96-99	122-128	199-199	134-142	107-107	123-129	241-241	129-135	116-122	127-127	79-79	127-130	140-140	237-237	124-124	202-202	250-256
MLG-349	TN0661056	Leaf	N 35 37 40.7	W 88 58 05.7	TN	V. vulpina	95-95	134-134	123-123	105-109	104-104	94-94	105-115	114-118	131-131	96-99	122-128	199-199	134-142	107-107	123-123	241-241	129-135	116-122	127-127	79-79	127-130	140-140	237-237	124-124	202-202	250-256
MLG-349	TN0661057	Leaf	N 35 37 40.7	W 88 58 05.7	TN	V. vulpina	95-95	134-134	123-123	105-109	104-104	94-94	105-115	114-118	131-131	96-99	122-128	199-199	134-142	107-107	123-123	241-241	129-135	116-122	127-127	79-79	127-130	140-140	237-237	124-124	202-202	250-256
MLG-351	TN0671062	Leaf	N 35 13 30.7	W 89 44 05.6	TN	V. vulpina	106-106	134-134	125-125	105-105	104-104	94-94	105-105	114-124	131-131	96-99	122-125	193-193	134-134	107-107	123-123	241-241	135-138	119-122	127-127	ND	127-127	143-146	237-237	122-126	202-202	248-252
MLG-352	TN0671063	Leaf	N 35 13 30.7	W 89 44 05.6	TN	V. vulpina	97-97	134-134	125-125	105-107	104-106	94-94	105-105	116-118	131-131	87-99	122-122	193-199	134-134	107-107	120-123	241-241	129-138	119-119	127-127	79-79	127-130	140-143	237-237	122-122	202-202	250-252
MLG-353	TN0671064	Leaf	N 35 13 30.7	W 89 44 05.6	TN	V. vulpina	97-97	134-134	125-125	105-105	104-104	94-94	105-113	110-114	131-131	99-99	122-125	193-196	134-166	107-107	123-123	241-241	129-138	119-119	127-127	79-79	127-127	140-143	237-237	122-124	202-202	250-252
MLG-354	TX0831351	Leaf	N 32 10 26.9	W 95 59 54.1	TX	V. vulpina	91-93	134-134	123-125	105-109	104-108	94-94	105-105	120-120	131-131	96-96	122-122	193-196	144-146	107-107	123-123	ND	126-135	119-122	127-127	79-79	127-130	140-140	237-237	126-126	202-202	246-250
MLG-355	TX0831352	Leaf	N 32 10 26.9	W 95 59 54.1	TX	V. vulpina	ND	134-134	123-125	105-112	ND	94-94	105-105	120-120	131-131	96-96	122-122	193-196	144-146	107-107	123-123	241-241	126-135	119-122	127-127	79-79	127-130	140-140	237-237	126-126	202-202	246-250
MLG-356	TX0831353	Leaf	N 32 10 26.9	W 95 59 54.1	TX	V. vulpina	87-87	134-134	125-125	105-105	104-106	94-94	109-115	112-118	131-131	96-96	122-122	193-196	142-156	107-107	123-123	241-241	126-135	113-116	127-127	79-79	119-127	140-140	237-237	124-126	202-202	248-250
MLG-357	TX0831354	Leaf	N 32 10 26.9	W 95 59 54.1	TX	V. vulpina	89-91	134-134	125-125	105-105	104-108	94-94	105-105	112-112	131-131	96-96	122-122	193-196	142-150	107-107	123-123	241-241	129-135	119-119	127-127	79-79	127-127	140-140	237-237	124-124	202-202	250-250
MLG-358	TX0831355	Leaf	N 32 10 26.9	W 95 59 54.1	TX	V. vulpina	89-89	134-134	125-125	105-112	104-106	94-111	105-105	112-112	131-131	96-99	125-125	193-193	142-142	107-107	123-123	241-241	129-150	119-122	127-127	79-79	130-130	140-140	237-237	126-126	202-202	252-256
MLG-359	TX0841361	Leaf	N 33 45 11.8	W 96 09 18.4	TX	V. vulpina	89-89	134-134	125-125	105-112	ND	94-94	105-105	112-118	131-131	96-96	122-122	193-193	120-142	107-107	123-123	241-241	135-135	116-119	127-127	79-79	127-127	140-140	238-238	124-126	202-202	248-248
MLG-360	TX0841362	Leaf	N 33 45 11.8	W 96 09 18.4	TX	V. vulpina	110-116	134-136	125-125	105-112	100-104	94-94	105-109	108-120	131-131	96-99	ND	ND	166-166	107-107	120-120	241-241	126-135	119-119	127-127	79-79	127-127	134-140	237-237	124-126	202-202	ND
MLG-361	TX0841363	Leaf	N 33 45 11.8	W 96 09 18.4	TX	V. vulpina	89-95	134-134	125-125	105-109	104-106	94-94	105-115	112-120	131-131	96-96	122-122	196-196	120-142	107-107	123-123	241-241	129-129	113-122	127-127	79-79	119-127	140-140	237-237	126-126	202-202	250-250
MLG-362	TX0841364	Leaf	N 33 45 11.8	W 96 09 18.4	TX	V. vulpina	106-106	134-136	125-125	105-112	ND	94-94	105-109	108-120	131-131	96-99	122-125	193-199	166-166	107-107	120-123	241-241	126-135	119-119	127-127	79-79	127-127	140-140	237-237	124-124	202-202	238-260
MLG-363	TX0841365	Leaf	N 33 45 11.8	W 96 09 18.4	TX	V. vulpina	106-106	134-136	125-125	105-112	100-106	94-94	105-109	108-120	131-131	ND	ND	193-199	166-166	107-107	120-123	ND	126-135	110-119	127-127	79-79	127-127	140-140	237-237	124-124	202-202	238-260
MLG-364	TX0841371	Leaf	N 33 45 11.8	W 96 09 18.4	TX	V. vulpina	104-104	134-134	125-125	105-105	104-104	94-94	105-111	112-118	131-131	96-96	122-122	193-199	136-142	107-107	123-126	241-241	114-114	113-113	ND	79-79	127-127	140-143	237-237	126-126	202-202	234-250
MLG-365	TX0851381	Leaf	N 30 06 08.6	W 95 25 04.5	TX	V. vulpina	93-110	134-136	125-125	105-105	104-106	94-94	ND	108-120	131-131	96-99	122-125	193-199	166-166	107-107	120-123	241-241	126-135	119-119	127-127	79-79	127-127	140-140	237-237	124-124	202-202	238-260
MLG-366	TX0851383	Leaf	N 30 06 08.6	W 95 25 04.5	TX	V. vulpina	95-95	134-134	123-125	105-112	104-106	94-94	107-113	120-120	131-131	84-96	122-122	193-205	150-152	107-107	123-123	241-241	135-135	119-119	127-127	79-79	130-130	140-140	237-237	124-124	202-202	238-260
MLG-366	TX0851384	Leaf	N 30 06 08.6	W 95 25 04.5	TX	V. vulpina	95-95	134-134	123-125	105-112	104-106	94-94	107-113	120-120	131-131	84-96	122-122	193-205	150-152	107-107	123-123	241-241	135-135	119-119	127-127	79-79	130-130	140-140	237-237	124-124	202-202	238-260
MLG-367	TX0851385	Leaf	N 30 06 08.6	W 95 25 04.5	TX	V. vulpina	95-95	134-134	123-125	105-112	104-106	94-94	107-113	120-120	131-131	84-96	122-122	193-205	142-152	107-107	123-123	241-241	135-135	119-119	127-127	79-79	130-130	140-140	237-237	124-124	202-202	238-260
MLG-368	TX0851391	Leaf	N 30 06 08.6	W 95 25 04.5	TX	V. vulpina	91-93	134-134	123-125	103-105	104-106	94-94	107-113	120-120	131-131	84-96	122-131	193-205	150-152	107-107	123-123	241-241	135-135	119-119	127-127	79-79	130-130	140-140	237-237	124-124	202-202	238-260
MLG-369	TX0851392	Leaf	N 30 06 08.6	W 95 25 04.5	TX	V. vulpina	110-110	134-136	125-136	112-112	106-106	94-111	105-117	114-122	131-134	87-90	122-134	193-199	134-142	104-104	123-123	238-241	126-126	110-119	129-138	100-100	121-121	143-143	225-225	128-128	202-203	262-267
MLG-370	TX0851393	Leaf	N 30 06 08.6	W 95 25 04.5	TX	V. vulpina	110-110	134-136	134-136	105-112	ND	94-111	105-119	120-122	131-134	87-87	131-134	199-199	148-158	104-104	123-123	238-241	123-126	110-119	127-129	100-100	121-127	134-143	225-225	126-128	202-203	260-267
MLG-072	TX0851394	Leaf	N 30 06 08.6	W 95 25 04.5	TX	V. vulpina	110-110	134-136	125-138	105-112	106-110	94-120	105-121	118-120	131-134	ND	122-131	193-199	136-146	104-110	120-126	238-241	126-126	110-119	127-135	100-100	121-130	134-143	237-237	122-128	202-202	242-250
MLG-371	UT1051611	Leaf	N 37 12 33.0	W 112 58 50.2	UT	V. treleasei	116-116	132-132	135-135	ND	100-101	100-100	111-111	118-118	134-137	87-87	125-125	193-193	126-126	107-107	114-114	238-238	129-129	107-107	127-127	79-79	121-127	134-137	238-238	120-120	226-226	ND
MLG-372	UT1051613	Leaf	N 37 12 33.0	W 112 58 50.2	UT	V. treleasei	110-114	132-132	ND	ND	100-101	100-100	111-111	118-118	134-137	87-87	125-125	187-193	126-126	107-107	114-114	238-238	129-129	107-107	127-127	79-79	121-127	134-137	ND	120-120	226-226	253-253
MLG-373	UT1051614	Leaf	N 37 12 33.0	W 112 58 50.2	UT	V. treleasei	110-110	132-132	ND	ND	100-101	100-100	111-111	118-118	134-137	87-87	125-125	187-193	126-126	107-107	114-114	238-238	129-129	107-107	127-127	79-79	121-127	134-137	238-238	120-120	226-226	253-253
MLG-374	VA0410561	Leaf	N 37 45 07.9	W 77 51 43.8	VA	V. vulpina	93-93	146-146	117-117	107-112	100-106	94-96	109-113	112-112	137-137	93-96	119-119	193-199	142-142	110-110	117-123	229-229	126-126	119-122	129-132	79-79	127-127	137-143	238-238	122-122	196-196	260-260
MLG-375	VA0410562	Leaf	N 37 45 07.9	W 77 51 43.8	VA	V. vulpina	93-93	146-158	117-117	107-112	100-106	94-96	109-113	112-112	137-137	ND	119-119	193-199	142-142	110-110	117-123	229-229	126-126	119-122	129-132	79-79	127-127	137-143	238-238	122-122	196-196	260-260
MLG-376	VA0410563	Leaf	N 37 45 07.9	W 77 51 43.8	VA	V. vulpina	93-93	146-158	117-117	107-112	100-106	94-96	109-113	112-112	137-137	93-96	119-119	193-199	142-142	110-110	117-123	229-229	126-126	119-122	129-132	79-79	127-127	137-143	238-238	122-122	196-196	260-260
MLG-377	VA0420571	Leaf	N 37 47 45.3	W 79 42 52.3	VA	V. vulpina	91-120	134-152	125-127	107-114	100-108	94-94	109-109	112-116	131-131	93-93	122-122	193-193	150-160	107-107	114-123	241-241	123-123	116-116	127-127	79-79	127-127	137-143	ND	124-128	202-202	250-250
MLG-378	VA0420581	Leaf	N 37 47 45.3	W 79 42 52.3	VA	V. vulpina	116-116	134-134	125-125	107-107	104-108	94-94	105-111	112-124	131-140	87-96	122-125	190-193	134-160	107-107	120-123	229-241	123-123	116-116	127-127	79-79	127-127	143-143	237-238	124-124	202-202	250-260
MLG-379	VA0420582	Leaf	N 37 47 45.3	W 79 42 52.3	VA	V. vulpina	91-116	134-150	125-125	107-116	100-104	94-94	105-109	112-114	131-131	87-96	119-125	199-202	134-146	107-107	123-123	241-241	123-129	119-122	129-135	79-79	127-127	140-143	238-238	124-124	202-202	250-256
MLG-380	VA0420591	Leaf	N 37 47 45.3	W 79 42 52.3	VA	V. vulpina	116-116	134-134	125-125	107-114	108-122	94-94	109-111	110-116	131-131	87-93	119-122	187-193	134-146	107-107	117-123	229-241	123-126	116-119	127-129	79-79	121-127	137-143	237-237	124-124	202-202	250-267
MLG-381	VA0420592	Leaf	N 37 47 45.3	W 79 42 52.3	VA	V. vulpina	91-118	136-136	117-125	105-107	100-104	94-96	105-107	120-128	131-137	93-99	119-122	193-202	150-150	107-107	117-120	229-241	126-129	119-128	127-127	79-79	127-127	140-146	238-238	ND	202-202	256-262
MLG-382	VA0420593	Leaf	N 37 47 45.3	W 79 42 52.3	VA	V. vulpina	116-116	134-134	125-125	107-114	108-122	94-94	109-111	110-116	131-131	87-93	119-122	187-193	134-146	107-107	117-123	229-241	123-126	116-119	127-129	79-79	127-127	137-143	237-237	124-124	202-202	250-267
MLG-382	VA0420594	Leaf	N 37 47 45.3	W 79 42 52.3	VA	V. vulpina	116-116	134-134	125-125	107-114	108-122	94-94	109-111	110-116	131-131	87-93	119-122	187-193	134-146	107-107	117-123	229-241	123-126	116-119	127-129	79-79	127-127	137-143	237-237	124-124	202-202	250-267
MLG-383	VA0430601	Leaf	N 38 02 43.9	W 78 45 52.2	VA	V. vulpina	93-93	ND	117-123	107-107	100-100	96-98	105-113	112-124	131-137	93-96	119-122	193-199	166-166	107-110	117-123	229-241	129-138	119-119	129-135	79-79	124-124	137-137	237-238	122-122	196-203	271-281
MLG-383	VA0430602	Leaf	N 38 02 43.9	W 78 45 52.2	VA	V. vulpina	93-93	ND	117-123	107-107	100-100	96-98	105-113	112-124	131-137	93-96	119-122	193-199	166-166	107-110	117-123	229-241	129-138	119-119	129-135	79-79	124-124	137-137	237-238	122-122	196-203	271-281
MLG-383	VA0430603	Leaf	N 38 02 43.9	W 78 45 52.2	VA	V. vulpina	93-93	ND	117-123	107-107	100-100	96-98	105-113	112-124	131-137	93-96	119-122	193-199	166-166	107-110	117-123	229-241	129-138	119-119	129-135	79-79	124-124	137-137	237-238	122-122	196-203	271-281
MLG-384	VA0430604	Leaf	N 38 02 43.9	W 78 45 52.2	VA	V. vulpina	93-93	ND	117-123	107-107	100-100	96-98	ND	112-124	131-137	93-96	119-122	193-199	166-166	107-110	117-123	229-241	129-138	119-119	129-135	79-79	124-124	137-137	237-238	122-122	196-203	271-281
MLG-385	VA0430611	Leaf	N 38 02 43.9	W 78 45 52.2	VA	V. vulpina	91-93	146-152	117-125	107-112	100-104	96-96	113-115	112-112	137-137	93-93	122-125	193-193	142-152	ND	117-123	229-229	123-126	119-119	129-135	79-79	124-124	140-140	238-238	122-122	196-196	260-260
MLG-386	VA0430612	Leaf	N 38 02 43.9	W 78 45 52.2	VA	V. vulpina	91-93	142-152	117-117	107-107	100-104	94-94	105-109	112-124	131-137	93-93	119-122	193-193	146-146	110-110	117-117	229-241	126-126	119-122	132-135	79-79	124-124	137-137	237-238	122-126	199-199	260-281
MLG-387	VA0430613	Leaf	N 38 02 43.9	W 78 45 52.2	VA	V. vulpina	91-95	ND	117-117	107-107	104-114	96-96	107-109	112-112	137-140	93-93	119-119	193-193	150-172	107-110	117-117	229-241	126-126	116-122	132-135	79-79	124-127	137-140	238-238	124-126	196-202	260-260
MLG-388	VA0430614	Leaf	N 38 02 43.9	W 78 45 52.2	VA	V. vulpina	91-93	146-152	117-125	107-112	100-104	96-96	113-115	112-112	137-137	93-93	122-125	193-193	142-152	110-110	117-123	229-229	123-126	119-119	129-135	79-79	124-124	140-140	238-238	122-122	196-196	260-260
MLG-389	VA0440621	Leaf	N 37 42 01.4	W 77 45 02.1	VA	V. vulpina	93-93	142-148	117-117	107-109	108-108	94-96	107-113	112-112	137-137	93-93	119-119	193-196	142-144	ND	117-117	229-229	126-126	116-116	129-132	ND	127-130	137-137	237-238	122-122	196-205	271-281
MLG-390	VA0440631	Leaf	N 37 42 01.4	W 77 45 02.1	VA	V. vulpina	93-93	142-142	117-121	107-107	100-104	94-96	111-113	112-112	137-140	93-93	119-119	193-199	144-160	110-110	117-123	229-229	126-126	116-128	132-132	ND	127-127	137-143	238-238	122-122	196-203	260-269
MLG-391	VA0440632	Leaf	N 37 42 01.4	W 77 45 02.1	VA	V. vulpina	93-93	142-154	117-117	107-116	100-108	96-96	107-113	112-120	140-140	93-93	119-119	196-199	144-144	107-107	117-117	229-229	114-126	122-128	129-135	79-79	124-127	137-137	238-238	122-122	196-203	269-271
MLG-392	VA0440633	Leaf	N 37 42 01.4	W 77 45 02.1	VA	V. vulpina	93-93	142-154	117-117	107-116	100-100	96-96	107-113	112-120	140-140	93-93	119-119	196-199	144-144	107-107	117-117	229-229	114-126	122-128	129-135	79-79	124-127	137-137	238-238	122-122	196-203	269-271
MLG-393	VA0440641	Leaf	N 37 42 01.4	W 77 45 02.1	VA	V. cinerea X V. aestivalis hyb.	110-110	ND	123-132	114-114	108-108	97-97	109-109	114-120	140-140	93-93	113-122	187-187	132-132	104-104	120-120	ND	126-126	116-116	122-122	79-79	121-121	131-131	ND	124-124	187-187	228-236
MLG-394	VA0440642	Leaf	N 37 42 01.4	W 77 45 02.1	VA	V. cinerea X V. aestivalis hyb.	110-110	ND	123-133	114-114	108-108	97-97	109-109	114-120	140-140	93-93	113-122	187-187	132-132	104-104	120-120	ND	126-126	116-116	122-122	78-79	127-130	131-131	ND	124-124	187-187	228-236
MLG-395	VA0440651	Leaf	N 37 42 01.4	W 77 45 02.1	VA	V. cinerea X V. aestivalis hyb.	110-110	134-134	123-132	114-114	108-108	97-97	109-109	114-120	134-134	93-93	113-122	187-187	132-158	104-104	ND	ND	126-126	116-116	122-122	79-79	121-124	131-131	ND	124-130	187-187	228-228
MLG-396	VA0450661	Leaf	N 37 15 33.1	W 77 24 03.0	VA	V. vulpina	93-93	148-148	117-117	107-107	100-108	96-96	107-109	112-120	140-140	93-93	119-119	193-196	144-146	110-110	117-117	229-229	126-129	122-122	127-132	79-79	124-127	137-143	238-238	122-122	196-196	236-256
MLG-397	VA0450662	Leaf	N 37 15 33.1	W 77 24 03.0	VA	V. vulpina	93-93	148-166	117-117	107-107	100-108	96-96	107-109	112-120	140-140	93-93	119-119	ND	144-146	110-110	117-117	229-229	126-129	122-122	127-132	79-79	124-127	137-143	238-238	122-122	196-196	236-256
MLG-398	VA0450663	Leaf	N 37 15 33.1	W 77 24 03.0	VA	V. vulpina	93-93	148-166	117-117	107-107	100-108	96-96	107-109	112-120	140-140	93-93	119-119	193-196	144-146	110-110	117-117	229-229	126-129	122-122	127-132	79-79	124-127	137-143	238-238	122-122	196-196	236-256
MLG-399	VA0450664	Leaf	N 37 15 33.1	W 77 24 03.0	VA	V. vulpina	93-93	134-158	117-123	107-107	100-108	96-98	109-109	120-120	137-137	90-93	119-119	193-196	144-144	110-110	117-117	229-229	126-129	122-122	132-132	79-79	124-127	143-143	238-238	122-122	196-196	238-260
MLG-400	VA0450671	Leaf	N 37 15 33.1	W 77 24 03.0	VA	V. vulpina	93-93	148-150	121-123	107-107	108-108	96-96	109-113	112-124	137-140	93-93	109-119	193-196	144-156	107-110	ND	229-229	126-129	122-122	132-132	79-79	127-127	143-143	238-238	122-122	196-203	256-260
MLG-401	VA0450672	Leaf	N 37 15 33.1	W 77 24 03.0	VA	V. vulpina	93-93	150-150	121-123	107-107	108-108	ND	109-113	112-124	137-140	93-93	109-119	193-196	144-156	107-110	117-117	229-229	126-129	122-122	132-132	79-79	127-127	143-143	238-238	122-122	203-203	256-260
MLG-402	VA0450673	Leaf	N 37 15 33.1	W 77 24 03.0	VA	V. vulpina	93-93	150-150	121-123	107-107	108-108	96-96	109-113	112-124	137-140	93-93	109-119	193-196	144-156	107-110	117-117	229-229	126-129	122-122	132-132	79-79	127-127	143-143	238-238	122-122	203-203	256-260
MLG-403	VA0460681	Leaf	N 36 42 24.7	W 77 33 30.5	VA	V. vulpina	89-93	152-152	117-117	107-114	100-100	96-98	109-109	112-122	140-143	93-93	119-119	193-193	ND	110-110	117-120	229-229	126-126	119-122	132-135	ND	124-127	137-143	238-238	ND	199-199	260-260
MLG-404	VA0460682	Leaf	N 36 42 24.7	W 77 33 30.5	VA	V. vulpina	89-93	152-156	117-117	107-114	100-100	96-98	109-117	112-122	ND	93-93	119-119	193-193	121-121	110-110	117-120	229-229	126-126	119-122	132-135	79-79	124-127	137-143	238-238	122-122	ND	260-260
MLG-405	VA0470691	Leaf	N 38 04 27.9	W 79 05 02.4	VA	V. vulpina	93-93	150-150	117-117	112-114	100-100	94-96	109-113	112-112	137-137	93-93	119-131	193-196	148-164	107-110	117-123	229-229	126-126	116-119	129-135	79-79	127-127	137-137	237-238	122-122	ND	232-260
MLG-406	VA0480711	Leaf	N 37 15 33.1	W 77 24 03.0	VA	V. vulpina	93-93	ND	117-117	107-107	100-106	96-96	109-111	112-124	137-137	93-93	109-119	193-193	144-144	110-110	117-117	229-229	126-129	116-119	127-132	79-79	127-127	143-143	238-238	122-122	203-203	236-260
MLG-407	VA0480712	Leaf	N 37 15 33.1	W 77 24 03.0	VA	V. vulpina	93-93	166-166	117-117	107-107	100-106	96-96	109-111	112-124	137-137	93-93	109-119	193-193	144-144	110-110	117-117	229-229	126-129	116-119	127-132	79-79	127-127	143-143	238-238	122-122	196-203	236-260
MLG-408	VA0480713	Leaf	N 37 15 33.1	W 77 24 03.0	VA	V. vulpina	93-93	166-166	117-117	107-107	ND	96-96	109-111	112-124	137-137	93-93	109-119	193-193	144-144	110-110	117-117	229-229	126-129	116-119	127-132	79-79	127-127	143-143	238-238	122-122	196-203	236-260
MLG-407	VA0480714	Leaf	N 37 15 33.1	W 77 24 03.0	VA	V. vulpina	93-93	166-166	117-117	107-107	100-106	96-96	109-111	112-124	137-137	93-93	109-119	193-193	144-144	110-110	117-117	229-229	126-129	116-119	127-132	79-79	127-127	143-143	238-238	122-122	196-203	236-260
MLG-407	VA0480715	Leaf	N 37 15 33.1	W 77 24 03.0	VA	V. vulpina	93-93	166-166	117-117	107-107	100-106	96-96	109-111	112-124	137-137	93-93	109-119	193-193	144-144	110-110	117-117	229-229	126-129	116-119	127-132	79-79	127-127	143-143	238-238	122-122	196-203	236-260
MLG-409	VA0490721	Leaf	N 36 42 24.7	W 77 33 30.5	VA	V. vulpina	91-91	146-146	117-123	107-107	100-100	96-96	109-109	120-122	137-143	90-93	119-119	199-199	142-152	107-110	117-117	229-229	126-126	122-125	135-135	79-79	124-127	137-143	238-238	122-122	196-196	256-281
MLG-409	VA0490722	Leaf	N 36 42 24.7	W 77 33 30.5	VA	V. vulpina	91-91	146-146	117-123	107-107	100-100	96-96	109-109	120-122	137-143	90-93	119-119	199-199	142-152	107-110	117-117	229-229	126-126	122-125	135-135	79-79	124-127	137-143	238-238	122-122	196-196	256-281
MLG-410	VA0490723	Leaf	N 36 42 24.7	W 77 33 30.5	VA	V. vulpina	91-91	136-146	117-123	107-107	100-100	96-96	109-109	ND	137-143	90-93	119-122	ND	142-152	107-110	117-117	229-229	126-126	122-125	ND	79-79	124-127	137-143	238-238	122-122	196-196	256-281
MLG-411	VA0490724	Leaf	N 36 42 24.7	W 77 33 30.5	VA	V. vulpina	93-93	146-150	117-121	107-107	ND	96-98	109-113	112-122	137-137	90-93	119-119	193-199	132-164	107-107	117-117	229-229	126-126	122-125	129-135	79-79	124-124	137-137	237-238	122-122	196-196	256-260
MLG-412	VA0490725	Leaf	N 36 42 24.7	W 77 33 30.5	VA	V. vulpina	91-91	146-150	ND	107-107	108-116	96-100	109-109	122-124	137-137	93-93	116-119	193-193	142-154	107-110	117-120	229-229	126-126	122-122	132-135	79-79	124-127	137-137	238-238	122-122	196-203	238-271
MLG-413	VA0490726	Leaf	N 36 42 24.7	W 77 33 30.5	VA	V. vulpina	93-93	152-152	117-121	107-107	100-100	96-98	109-109	120-120	137-137	93-93	119-119	193-193	142-142	107-110	ND	ND	126-126	119-122	129-129	79-79	124-124	137-143	238-238	122-122	ND	260-262
MLG-414	VA0490732	Leaf	N 36 42 24.7	W 77 33 30.5	VA	V. vulpina	93-93	146-146	117-117	107-114	108-108	96-96	109-113	122-122	137-137	93-93	116-119	199-199	142-146	110-110	117-117	229-229	126-126	122-122	129-135	79-79	124-124	137-143	238-238	122-122	196-196	256-281
MLG-415	VA0490733	Leaf	N 36 42 24.7	W 77 33 30.5	VA	V. vulpina	93-93	146-148	117-117	107-107	108-108	96-98	109-109	112-120	137-137	90-93	116-119	193-193	130-156	107-107	117-117	229-229	126-126	122-122	129-135	79-79	124-124	137-143	238-238	122-122	196-196	238-281
MLG-416	VA0490741	Leaf	N 36 42 24.7	W 77 33 30.5	VA	V. vulpina	91-93	152-154	117-117	107-107	100-116	96-100	111-113	112-126	137-137	90-93	116-119	193-193	146-154	107-107	117-117	229-229	126-129	122-122	132-135	79-79	124-124	137-143	238-238	122-122	196-196	238-256
MLG-417	VA0490742	Leaf	N 36 42 24.7	W 77 33 30.5	VA	V. vulpina	91-91	152-152	117-117	107-107	100-116	96-100	107-113	120-120	137-137	93-93	116-122	193-193	144-154	107-110	117-120	229-229	126-126	122-122	129-129	79-79	124-124	143-143	237-238	122-122	196-196	256-260
MLG-418	VA0490743	Leaf	N 36 42 24.7	W 77 33 30.5	VA	V. vulpina	93-110	146-152	117-117	107-107	100-108	96-98	109-109	112-120	ND	90-93	119-119	193-199	142-154	107-110	117-117	229-229	126-126	119-122	135-135	79-79	124-127	137-143	238-238	122-122	ND	238-262
MLG-419	WV0380511	Leaf	N 38 49 22.0	W 81 43 40.4	WV	V. vulpina	95-95	134-134	123-123	105-105	104-120	94-94	105-111	122-122	131-131	87-96	122-125	187-196	134-134	107-107	120-120	241-241	132-135	119-122	127-127	79-79	127-127	143-143	237-237	124-124	202-202	250-252
MLG-420	WV0380512	Leaf	N 38 49 22.0	W 81 43 40.4	WV	V. vulpina	91-95	134-134	125-125	105-105	104-104	94-94	105-105	110-118	131-131	87-96	122-125	190-196	134-152	107-107	123-123	241-241	123-135	116-119	127-127	ND	127-127	140-140	237-237	124-128	202-202	232-252
MLG-421	WV0380513	Leaf	N 38 49 22.0	W 81 43 40.4	WV	V. vulpina	91-116	134-134	123-125	105-105	110-110	94-94	109-111	114-124	131-131	87-93	122-125	187-196	136-160	107-107	120-123	241-241	123-126	119-119	127-127	79-79	127-127	140-143	237-237	126-126	202-202	252-260
MLG-422	WV0390521	Leaf	N 37 48 55.0	W 80 25 40.9	WV	V. vulpina	120-120	134-134	125-125	107-109	104-106	94-94	105-109	114-114	131-131	96-99	122-122	193-193	148-160	107-107	120-120	241-241	123-129	119-122	127-127	ND	127-127	137-137	238-238	124-124	202-202	257-257
MLG-423	WV0390522	Leaf	N 37 48 55.0	W 80 25 40.9	WV	V. vulpina	120-120	134-134	125-125	107-109	104-106	94-94	105-109	112-114	131-131	96-99	122-122	193-193	148-160	107-107	120-120	241-241	123-129	119-122	127-127	ND	127-127	137-137	238-238	122-124	202-202	256-257
MLG-424	WV0400531	Leaf	N 38 04 04.1	W 81 22 49.9	WV	V. vulpina	122-122	134-134	125-125	105-112	104-112	94-94	105-105	114-124	131-131	96-96	122-122	187-193	134-134	107-107	114-120	241-241	123-129	119-122	127-127	79-79	127-127	137-140	237-238	124-124	202-202	250-250
MLG-425	WV0400532	Leaf	N 38 04 04.1	W 81 22 49.9	WV	V. vulpina	122-122	134-134	125-125	105-112	104-112	94-94	105-105	114-124	131-131	96-96	122-122	187-193	134-134	107-107	114-120	241-241	129-129	119-122	127-127	79-79	127-127	137-140	237-237	124-124	202-202	250-250
MLG-426	WV0400533	Leaf	N 38 04 04.1	W 81 22 49.9	WV	V. vulpina	122-122	134-134	125-125	105-112	104-112	94-94	105-105	114-124	131-131	96-96	122-122	187-193	134-134	107-107	114-120	241-241	123-129	119-122	127-127	79-79	127-127	137-140	237-237	124-124	202-202	250-250
MLG-426	WV0400534	Leaf	N 38 04 04.1	W 81 22 49.9	WV	V. vulpina	122-122	134-134	125-125	105-112	104-112	94-94	105-105	114-124	131-131	96-96	122-122	187-193	134-134	107-107	114-120	241-241	123-129	119-122	127-127	79-79	127-127	137-140	237-237	124-124	202-202	250-250
MLG-427	WV0400541	Leaf	N 38 04 04.1	W 81 22 49.9	WV	V. vulpina	116-116	134-134	123-125	105-107	104-110	94-94	105-111	122-124	131-131	ND	122-125	ND	134-160	107-107	120-120	229-241	123-129	119-122	127-127	79-79	127-127	140-143	237-237	124-124	202-202	250-269
MLG-428	WV0400542	Leaf	N 38 04 04.1	W 81 22 49.9	WV	V. vulpina	120-120	134-134	125-131	107-107	108-110	94-94	105-105	114-114	131-131	93-96	122-125	193-193	134-146	107-107	120-120	241-241	114-132	116-119	127-127	79-79	127-127	140-140	237-238	124-124	202-202	250-260
MLG-429	WV0400543	Leaf	N 38 04 04.1	W 81 22 49.9	WV	V. vulpina	116-116	134-136	125-125	105-107	106-110	94-94	105-105	124-130	131-131	87-96	122-125	190-199	134-134	107-110	123-123	241-241	123-126	119-119	127-127	79-79	127-127	137-143	237-237	124-124	202-202	ND
MLG-430	WV0400551	Leaf	N 38 04 04.1	W 81 22 49.9	WV	V. vulpina	118-118	134-134	123-132	105-107	110-110	94-94	105-105	116-118	131-131	96-96	122-122	187-199	134-146	107-107	120-123	241-241	126-129	116-116	127-127	79-79	127-127	143-143	237-237	126-126	202-202	252-252
MLG-431	WV0400552	Leaf	N 38 04 04.1	W 81 22 49.9	WV	V. vulpina	120-120	134-134	123-125	105-107	120-120	94-94	105-111	124-130	131-131	ND	122-122	187-199	136-136	107-107	120-120	241-241	123-129	116-116	127-127	79-79	127-127	137-143	237-237	124-124	202-202	250-250
MLG-432	WV0400553	Leaf	N 38 04 04.1	W 81 22 49.9	WV	V. vulpina	118-118	134-134	125-125	105-107	104-110	94-94	105-105	114-122	131-131	96-96	125-125	187-193	134-146	107-107	120-120	241-241	123-126	122-122	127-127	79-79	127-130	143-143	237-237	124-124	202-202	250-250
MLG-433	WV0400554	Leaf	N 38 04 04.1	W 81 22 49.9	WV	V. vulpina	116-116	134-134	125-125	105-105	104-104	94-94	105-111	122-124	131-131	ND	125-125	187-199	134-142	107-107	120-123	241-241	123-129	119-119	127-127	79-79	127-127	140-143	237-237	122-124	202-202	250-271
MLG-434	CA0010011	Root	N 39 24 13.7	W 123 21 6.1	CA	AxR#1	110-116	136-136	117-132	112-114	104-110	96-98	109-119	120-126	134-134	87-99	119-122	193-208	146-146	104-107	120-123	238-238	123-129	110-119	132-135	100-100	121-124	137-143	233-238	122-130	193-205	232-277
MLG-435	CA0020021	Root	N 38 31 45	W 121 47 43.9	CA	V. vinifera	110-116	136-136	117-136	112-114	104-110	96-111	109-119	120-126	134-137	ND	119-134	193-205	146-152	104-107	123-123	238-238	126-129	110-122	132-135	104-104	121-130	137-143	238-238	122-130	193-205	260-277
MLG-436	CA0030032	Root	N38 27 32.5	W122 22 34.7	CA	Freedom	110-110	136-136	134-138	114-118	106-110	111-115	119-119	120-120	134-134	87-90	131-131	193-193	134-134	104-104	123-123	238-238	114-129	110-110	135-138	100-100	121-121	134-143	233-233	127-130	199-202	232-232
MLG-437	CA0040041	Root	N 38 30 19.9	W 122 29 19.4	CA	Freedom	110-110	136-136	134-136	103-112	106-106	100-113	119-119	120-120	134-134	ND	131-131	193-193	162-162	104-104	123-123	238-238	120-129	110-110	141-141	104-104	121-121	143-143	233-233	128-132	199-202	253-253
MLG-438	CA0050051	Root	N 38 41 5	W 122 50 36.6	CA	101-14	110-110	136-136	134-138	116-118	110-110	111-111	117-119	120-122	134-134	ND	128-131	193-193	134-156	104-104	123-123	238-238	126-126	110-110	135-138	100-100	121-121	143-143	233-245	132-132	202-205	236-252
MLG-439	CA0060061	Leaf	N 38 30 6.2	W 121 58 49.9	CA	St. George	93-110	136-136	123-138	107-118	104-106	94-111	105-117	120-120	131-134	ND	122-122	193-193	136-136	104-107	123-123	238-241	123-135	110-119	127-135	79-100	121-127	134-140	233-233	126-128	202-205	232-248
MLG-440	CA1121891	Root	N 38 39 55.1	W 122 51 7.1	CA	101-14	110-110	136-136	134-138	116-118	110-110	111-111	117-119	120-122	134-134	87-90	128-131	193-193	134-146	104-104	123-123	ND	126-126	110-110	135-138	100-100	121-121	143-143	233-233	131-131	202-205	236-252
MLG-441	ARG1111871	Root	Argentina		ARG	Unknown	110-116	ND	117-132	112-114	104-106	96-111	109-119	120-126	134-137	87-99	119-131	193-205	146-146	104-107	123-123	238-238	126-129	110-119	132-135	100-100	121-130	134-137	233-238	122-130	205-205	232-277
MLG-442	ARG1111881	Root	Argentina		ARG	Unknown	110-116	ND	117-132	112-114	104-110	96-111	109-119	120-126	134-134	87-93	119-122	193-208	142-146	104-107	123-123	238-238	123-129	110-119	132-135	100-100	121-130	137-143	233-238	122-130	193-205	232-277
MLG-443	AUS1071701	Root	Austria		AUS	Unknown	93-110	136-136	136-138	114-118	106-106	113-115	119-119	122-122	134-134	87-90	131-134	193-193	134-154	104-107	123-123	238-238	123-129	110-110	138-138	91-91	121-121	143-143	233-233	126-128	205-205	250-250
MLG-444	AUS1071711	Root	Austria		AUS	Unknown	110-110	136-136	134-134	112-114	106-106	98-113	119-119	122-122	134-134	87-90	128-131	193-193	156-156	104-107	126-126	238-238	129-129	110-110	135-135	100-100	121-121	143-143	233-233	126-126	199-199	232-267
MLG-445	AUS1071721	Root	Austria		AUS	Unknown	93-110	136-136	136-138	112-112	106-108	113-115	119-119	122-122	134-134	87-90	131-134	193-193	116-134	104-104	123-123	238-238	132-132	110-110	135-135	100-100	121-121	134-143	233-233	128-134	199-205	ND
MLG-446	AUS1071731	Root	Austria		AUS	Unknown	93-110	136-136	134-138	116-116	108-110	111-115	119-119	120-122	134-134	87-87	128-131	193-193	156-160	104-104	120-123	ND	123-123	110-110	135-138	100-100	121-121	143-143	233-233	130-134	ND	232-232
MLG-447	AUS1071741	Root	Austria		AUS	Unknown	110-110	136-136	136-138	103-116	106-110	100-113	119-119	120-120	134-134	87-90	128-131	193-193	152-156	104-104	123-123	238-238	123-126	110-110	138-138	97-100	121-121	134-143	233-233	128-134	199-199	232-232
MLG-448	AUS1071751	Root	Austria		AUS	Unknown	110-110	136-136	136-138	103-114	106-110	111-111	119-119	120-122	134-134	87-90	128-131	193-193	116-156	104-104	123-126	238-238	120-126	110-110	135-138	91-104	121-121	143-143	233-233	128-132	199-199	254-254
MLG-449	AUS1071761	Root	Austria		AUS	Unknown	ND	136-136	124-136	112-112	106-106	94-96	119-119	120-120	134-134	87-90	ND	193-193	116-156	104-104	123-123	238-238	123-126	110-110	135-135	100-100	121-121	143-143	233-233	128-128	199-202	232-232
MLG-450	BRA1091811	Root	Brazil		BRA	Unknown	110-110	136-136	134-136	112-112	106-106	115-115	119-119	120-120	134-134	87-90	131-131	193-193	ND	104-104	123-126	238-238	123-129	110-110	ND	100-100	121-121	134-143	233-233	128-132	202-202	232-256
MLG-451	BRA1091821	Root	Brazil		BRA	Unknown	110-110	136-136	134-134	112-112	106-112	100-115	119-119	120-120	134-134	87-90	131-131	193-193	146-146	104-104	123-123	238-238	114-126	ND	129-129	100-100	121-121	134-134	233-233	128-132	199-202	236-256
MLG-452	BRA1091831	Root	Brazil		BRA	Unknown	110-110	136-136	134-134	112-114	106-106	115-115	119-119	120-120	134-134	87-90	131-131	193-199	134-154	104-104	123-123	238-238	123-129	110-110	129-141	100-100	121-121	134-143	233-233	126-130	202-205	232-240
MLG-453	HUN1061621	Root	Hungary		HUN	V. vinifera	93-110	136-136	138-138	113-113	106-110	94-115	119-119	120-120	134-134	87-90	131-131	193-196	158-166	104-104	123-123	238-238	123-123	110-110	ND	91-100	121-121	134-143	233-233	ND	ND	232-232
MLG-454	HUN1061631	Root	Hungary		HUN	V. vinifera	93-110	136-136	138-138	112-112	106-110	115-115	119-119	120-120	134-134	87-90	128-131	193-196	158-166	104-104	123-123	238-238	123-123	110-110	135-138	91-100	121-121	134-143	233-233	126-130	187-199	232-256
MLG-455	HUN1061641	Root	Hungary		HUN	V. vinifera	110-110	ND	138-138	112-112	106-110	115-115	119-119	120-120	134-134	87-90	128-131	193-196	158-166	104-104	123-123	238-238	123-123	110-110	135-138	91-100	121-121	134-143	233-233	126-130	199-205	232-256
MLG-456	HUN1061651	Root	Hungary		HUN	V. vinifera	110-110	136-136	138-138	112-112	106-110	115-115	119-119	120-120	134-134	87-90	128-131	193-196	158-166	104-104	123-123	238-238	123-123	110-110	135-138	91-100	121-121	134-143	233-233	126-130	199-205	232-256
MLG-457	HUN1061661	Root	Hungary		HUN	V. rupestris	ND	136-136	136-138	107-118	106-106	98-115	117-119	120-122	134-134	87-90	119-131	193-193	168-170	104-104	123-123	238-238	120-129	110-110	135-138	91-100	121-121	134-134	233-233	126-130	193-202	232-232
MLG-458	HUN1061671	Root	Hungary		HUN	V. rupestris	93-110	136-136	136-138	114-114	106-106	98-115	117-119	120-122	134-134	87-90	119-131	193-193	168-170	104-104	123-123	238-238	129-135	110-110	135-138	91-100	121-121	134-134	233-233	126-130	202-202	232-232
MLG-459	HUN1061681	Root	Hungary		HUN	V. rupestris	93-110	136-136	136-138	114-118	106-106	98-115	117-119	120-122	134-134	87-90	131-131	193-193	116-170	104-104	123-123	238-238	120-129	110-110	135-138	91-100	121-121	134-134	233-233	126-130	202-205	232-257
MLG-460	HUN1061691	Root	Hungary		HUN	V. rupestris	110-110	136-136	134-134	112-114	106-110	111-115	117-119	120-122	134-134	87-90	128-131	193-193	116-154	104-104	123-123	238-238	123-129	110-110	135-138	100-100	121-121	134-134	233-233	128-130	202-202	232-232
MLG-461	PER1101841	Root	Peru		PER	Unknown	93-110	136-136	117-136	112-114	104-110	96-111	109-119	120-126	134-137	ND	119-134	193-205	146-146	104-107	ND	238-238	126-129	110-122	132-135	104-104	121-130	137-143	238-238	122-130	193-205	260-277
MLG-435	PER1101851	Root	Peru		PER	Unknown	110-116	136-136	117-136	112-114	104-110	96-111	109-119	120-126	134-137	ND	119-134	193-205	146-152	104-107	123-123	238-238	126-129	110-122	132-135	104-104	121-130	137-143	238-238	122-130	193-205	260-277
MLG-462	PER1101861	Root	Peru		PER	Unknown	110-116	136-136	117-136	112-114	104-110	96-111	109-119	120-126	134-137	ND	119-134	193-205	146-156	104-107	123-123	238-238	126-129	110-122	132-135	104-104	121-130	137-143	238-238	122-130	193-205	260-277
MLG-463	URU1081771	Root	Uruguay		URU	V. rupestris	110-110	136-136	132-134	112-114	106-106	115-115	119-119	124-124	134-134	87-90	122-131	193-193	156-156	104-104	123-123	238-238	123-126	110-110	129-135	100-100	121-121	143-143	233-245	130-132	199-199	232-232
MLG-464	URU1081781	Root	Uruguay		URU	SO4	93-110	136-136	134-136	117-119	106-106	115-115	119-119	120-120	134-134	87-90	131-131	193-193	154-154	104-104	123-123	238-238	123-123	110-110	135-135	100-100	121-121	143-143	233-233	130-130	ND	232-232
MLG-465	URU1081791	Root	Uruguay		URU	SO4	110-110	136-136	136-138	112-116	106-106	113-113	119-119	120-120	134-134	87-90	131-131	193-193	156-156	104-104	123-126	238-238	123-126	110-110	135-135	91-100	121-121	134-143	233-233	128-128	202-205	236-254
MLG-466	URU1081801	Root	Uruguay		URU	R99	110-110	136-136	134-136	112-116	106-106	111-115	ND	120-124	134-134	87-93	122-131	193-205	134-134	104-104	123-126	238-238	126-129	110-110	135-138	100-100	121-121	ND	233-233	132-132	202-205	254-257
